# Supplementary material
Source: HighWire-hosted journal article supplement (https://bmjopensem.bmj.com/content/7/1/e000876)
Supplement: inline-supplementary-material-3 [file inline-supplementary-material-3.xlsx]

## Sheet: Participant_5
Time	Object	Side	Frequency	Stiffness	Decrement	Relaxation	Creep	Time	Object	Side	Frequency	Stiffness	Decrement	Relaxation	Creep	Time	Object	Side	Frequency	Stiffness	Decrement	Relaxation	Creep	Time	Object	Side	Frequency	Stiffness	Decrement	Relaxation	Creep	Time	Object	Side	Frequency	Stiffness	Decrement	Relaxation	Creep	Time	Object	Side	Frequency	Stiffness	Decrement	Relaxation	Creep
9h	Tric Br c l	Left	14.03	235	1.32	20.9	1.23	9h	Rect Femoris	Left	12.47	213	1.37	24.8	1.48	9h	Gastr c m	Left	12.67	209	1.24	26.5	1.59	9h	Deltoideus	Left	15.47	245	0.86	18.5	1.08	9h	Bic Fem c br	Left	17.61	310	1.35	15.6	0.95	9h	Add Pollicis	Left	21.67	391	1.79	13	0.81
9h	Tric Br c l	Left	13.73	221	1.31	21.1	1.22	9h	Rect Femoris	Left	12.47	218	1.37	24.1	1.42	9h	Gastr c m	Left	12.68	208	1.24	26	1.55	9h	Deltoideus	Left	15.37	248	0.86	18.4	1.07	9h	Bic Fem c br	Left	17.8	316	1.38	15.4	0.94	9h	Add Pollicis	Left	21.57	396	1.72	12.9	0.81
9h	Tric Br c l	Left	13.83	227	1.3	21.1	1.22	9h	Rect Femoris	Left	12.38	212	1.37	24.8	1.47	9h	Gastr c m	Left	12.77	213	1.24	26.3	1.59	9h	Deltoideus	Left	15.47	250	0.85	18.3	1.07	9h	Bic Fem c br	Left	17.8	317	1.34	15.3	0.93	9h	Add Pollicis	Left	21.57	396	1.69	12.7	0.79
9h	Tric Br c l	Left	13.93	228	1.34	21	1.21	9h	Rect Femoris	Left	12.47	215	1.39	24.4	1.44	9h	Gastr c m	Left	12.67	211	1.25	26.5	1.6	9h	Deltoideus	Left	15.47	246	0.86	18	1.04	9h	Bic Fem c br	Left	18	327	1.4	15.2	0.93	9h	Add Pollicis	Left	21.77	400	1.73	12.7	0.79
9h	Tric Br c l	Left	13.93	227	1.32	21.3	1.25	9h	Rect Femoris	Left	12.18	212	1.37	24.9	1.48	9h	Gastr c m	Left	12.58	210	1.24	26.4	1.59	9h	Deltoideus	Left	15.57	251	0.83	18.3	1.07	9h	Bic Fem c br	Left	17.79	325	1.37	15.3	0.94	9h	Add Pollicis	Left	21.97	401	1.74	12.8	0.8
12h	Tric Br c l	Left	13.69	228	1.4	21.7	1.29	12h	Rect Femoris	Left	12.42	216	1.28	24.5	1.47	12h	Gastr c m	Left	12.74	206	1.43	27.1	1.65	12h	Deltoideus	Left	17.38	304	0.92	16	0.96	12h	Bic Fem c l	Left	15.36	311	1.45	17.2	1.06	12h	Abd Poll Br	Left	21.29	397	1.93	12.6	0.79
12h	Tric Br c l	Left	13.99	237	1.4	21	1.26	12h	Rect Femoris	Left	12.72	229	1.3	23.7	1.43	12h	Gastr c m	Left	12.74	211	1.45	27.6	1.7	12h	Deltoideus	Left	17.1	295	0.91	16.1	0.96	12h	Bic Fem c l	Left	14.97	303	1.44	17.4	1.07	12h	Abd Poll Br	Left	21.29	404	1.96	12.5	0.78
12h	Tric Br c l	Left	13.89	244	1.4	21.1	1.27	12h	Rect Femoris	Left	12.72	230	1.3	23.5	1.41	12h	Gastr c m	Left	12.74	214	1.45	27.3	1.68	12h	Deltoideus	Left	17.09	296	0.91	16	0.95	12h	Bic Fem c l	Left	15.07	301	1.38	17.1	1.04	12h	Abd Poll Br	Left	21.19	407	1.96	12.5	0.78
12h	Tric Br c l	Left	13.89	239	1.42	21	1.26	12h	Rect Femoris	Left	12.43	217	1.27	24.1	1.44	12h	Gastr c m	Left	12.64	212	1.45	27.6	1.71	12h	Deltoideus	Left	17.19	298	0.91	16	0.95	12h	Bic Fem c l	Left	15.07	311	1.42	17.2	1.06	12h	Abd Poll Br	Left	20.99	408	1.95	12.6	0.79
12h	Tric Br c l	Left	13.79	238	1.36	21	1.26	12h	Rect Femoris	Left	12.62	219	1.26	23.9	1.42	12h	Gastr c m	Left	12.74	214	1.46	27.4	1.69	12h	Deltoideus	Left	17.08	293	0.88	16.1	0.96	12h	Bic Fem c l	Left	14.97	308	1.41	17.3	1.06	12h	Abd Poll Br	Left	20.9	407	1.91	12.6	0.79
15h	Tric Br c l	Left	14.25	255	1.35	19.7	1.19	15h	Rect Femoris	Left	12.31	201	1.25	25.5	1.52	15h	Gastr c m	Left	13	210	1.32	26.1	1.57	15h	Deltoideus	Left	17.34	296	1	16.3	0.99	15h	Bic Fem c l	Left	14.16	266	1.44	19.4	1.19	15h	Abd Poll Br	Left	21.24	392	1.66	12.5	0.79
15h	Tric Br c l	Left	14.34	257	1.34	19.5	1.19	15h	Rect Femoris	Left	12.2	202	1.21	25.7	1.54	15h	Gastr c m	Left	12.99	220	1.38	26.1	1.6	15h	Deltoideus	Left	17.63	300	1.01	16	0.97	15h	Bic Fem c l	Left	13.86	266	1.4	19.3	1.17	15h	Abd Poll Br	Left	21.53	397	1.64	12.5	0.79
15h	Tric Br c l	Left	14.16	260	1.3	19.8	1.21	15h	Rect Femoris	Left	12.3	203	1.25	25.6	1.53	15h	Gastr c m	Left	12.99	215	1.4	26	1.58	15h	Deltoideus	Left	17.26	298	0.99	16.2	0.99	15h	Bic Fem c l	Left	14.46	278	1.46	19.2	1.18	15h	Abd Poll Br	Left	21.42	398	1.61	12.5	0.79
15h	Tric Br c l	Left	14.14	258	1.29	19.8	1.21	15h	Rect Femoris	Left	12.3	203	1.24	25.4	1.5	15h	Gastr c m	Left	13.09	215	1.35	26	1.59	15h	Deltoideus	Left	17.15	296	0.99	16.2	0.98	15h	Bic Fem c l	Left	14.54	279	1.44	19	1.17	15h	Abd Poll Br	Left	21.42	399	1.59	12.4	0.78
15h	Tric Br c l	Left	14.16	262	1.3	19.6	1.2	15h	Rect Femoris	Left	12.11	195	1.27	25.7	1.5	15h	Gastr c m	Left	13.09	215	1.36	26	1.59	15h	Deltoideus	Left	17.25	298	0.99	16.1	0.98	15h	Bic Fem c l	Left	13.77	273	1.45	19.5	1.2	15h	Abd Poll Br	Left	21.71	400	1.62	12.3	0.77
18h	Tric Br c l	Left	13.16	227	1.35	23.2	1.43	18h	Rect Femoris	Left	12.08	202	1.17	25.5	1.52	18h	Gastr c m	Left	13.36	205	1.13	25.9	1.56	18h	Deltoideus	Left	17.63	312	0.94	15.4	0.93	18h	Bic Fem c l	Left	13.93	257	1.29	20.7	1.26	18h	Abd Poll Br	Left	23.78	494	1.66	10.1	0.65
18h	Tric Br c l	Left	13.15	228	1.29	22.9	1.39	18h	Rect Femoris	Left	11.88	198	1.15	25.3	1.49	18h	Gastr c m	Left	13.46	208	1.14	25.5	1.52	18h	Deltoideus	Left	17.63	315	0.95	15.3	0.93	18h	Bic Fem c l	Left	14.13	258	1.27	20.5	1.25	18h	Abd Poll Br	Left	23.96	504	1.61	10.1	0.65
18h	Tric Br c l	Left	12.96	227	1.27	23	1.39	18h	Rect Femoris	Left	11.97	201	1.15	25.7	1.53	18h	Gastr c m	Left	13.36	209	1.12	25.6	1.54	18h	Deltoideus	Left	17.82	317	0.94	15	0.91	18h	Bic Fem c l	Left	14.04	258	1.24	20.7	1.26	18h	Abd Poll Br	Left	23.96	505	1.58	10.1	0.65
18h	Tric Br c l	Left	12.86	227	1.25	23.2	1.4	18h	Rect Femoris	Left	12.08	205	1.17	25.3	1.52	18h	Gastr c m	Left	13.36	210	1.14	25.4	1.52	18h	Deltoideus	Left	17.82	323	0.95	15.1	0.92	18h	Bic Fem c l	Left	13.93	256	1.23	20.7	1.25	18h	Abd Poll Br	Left	24.17	508	1.58	10.1	0.65
18h	Tric Br c l	Left	13.16	230	1.3	22.9	1.39	18h	Rect Femoris	Left	11.97	206	1.17	25.2	1.5	18h	Gastr c m	Left	13.26	209	1.15	25.6	1.54	18h	Deltoideus	Left	18.12	326	0.94	14.9	0.91	18h	Bic Fem c l	Left	14.12	259	1.23	20.4	1.24	18h	Abd Poll Br	Left	24.26	511	1.55	10	0.64
9h	Tric Br c l	Right	12.96	217	1.4	24.3	1.46	9h	Rect Femoris	Right	13.34	230	1.4	23.7	1.44	9h	Gastr c m	Right	12.77	203	1.16	27.1	1.62	9h	Deltoideus	Right	15.28	231	0.98	18.9	1.09	9h	Bic Fem c br	Right	18.48	344	1.4	14.4	0.88	9h	Add Pollicis	Right	20.51	357	1.74	13.7	0.85
9h	Tric Br c l	Right	12.96	209	1.37	24.2	1.44	9h	Rect Femoris	Right	13.15	230	1.39	23.8	1.44	9h	Gastr c m	Right	12.67	202	1.15	27.2	1.63	9h	Deltoideus	Right	15.28	239	0.99	19	1.11	9h	Bic Fem c br	Right	19.15	352	1.38	13.9	0.85	9h	Add Pollicis	Right	21.09	364	1.71	13.4	0.83
9h	Tric Br c l	Right	12.77	210	1.35	24.2	1.42	9h	Rect Femoris	Right	13.05	233	1.39	23.8	1.44	9h	Gastr c m	Right	12.58	194	1.16	27.3	1.63	9h	Deltoideus	Right	15.47	237	0.99	18.5	1.07	9h	Bic Fem c br	Right	19.54	354	1.37	13.8	0.85	9h	Add Pollicis	Right	21.38	369	1.67	13.1	0.81
9h	Tric Br c l	Right	12.68	210	1.34	24.4	1.45	9h	Rect Femoris	Right	13.25	237	1.36	23.5	1.43	9h	Gastr c m	Right	12.58	194	1.15	27.3	1.63	9h	Deltoideus	Right	15.38	240	0.97	18.8	1.1	9h	Bic Fem c br	Right	18.96	354	1.4	14	0.86	9h	Add Pollicis	Right	21.09	372	1.69	13.3	0.82
9h	Tric Br c l	Right	12.58	207	1.29	24.6	1.46	9h	Rect Femoris	Right	13.15	235	1.37	23.6	1.42	9h	Gastr c m	Right	12.58	204	1.17	26.9	1.62	9h	Deltoideus	Right	14.99	231	0.98	19.1	1.1	9h	Bic Fem c br	Right	19.25	355	1.38	13.9	0.86	9h	Add Pollicis	Right	21.57	375	1.64	13.1	0.81
12h	Tric Br c l	Right	14.76	279	1.51	18.1	1.1	12h	Rect Femoris	Right	12.71	240	1.23	24.3	1.49	12h	Gastr c m	Right	13.23	215	1.34	26.7	1.61	12h	Deltoideus	Right	16.89	289	0.92	16	0.94	12h	Bic Fem c l	Right	16.04	288	1.62	18	1.1	12h	Abd Poll Br	Right	22.44	414	1.88	12.3	0.78
12h	Tric Br c l	Right	14.38	277	1.45	18.3	1.1	12h	Rect Femoris	Right	12.81	244	1.21	24	1.49	12h	Gastr c m	Right	13.23	216	1.33	26.6	1.63	12h	Deltoideus	Right	16.69	279	0.9	16.2	0.95	12h	Bic Fem c l	Right	15.85	293	1.58	18.3	1.12	12h	Abd Poll Br	Right	22.24	415	1.85	12.3	0.77
12h	Tric Br c l	Right	14.28	266	1.41	18.7	1.12	12h	Rect Femoris	Right	12.71	239	1.17	24.3	1.49	12h	Gastr c m	Right	13.03	212	1.42	26.9	1.61	12h	Deltoideus	Right	16.59	287	0.9	16.1	0.95	12h	Bic Fem c l	Right	15.83	283	1.61	18.3	1.12	12h	Abd Poll Br	Right	22.34	418	1.79	12.1	0.76
12h	Tric Br c l	Right	14.67	280	1.44	18	1.09	12h	Rect Femoris	Right	12.81	242	1.2	24.1	1.49	12h	Gastr c m	Right	13.23	216	1.35	26.6	1.64	12h	Deltoideus	Right	16.59	285	0.89	16.3	0.97	12h	Bic Fem c l	Right	15.65	285	1.55	18.1	1.11	12h	Abd Poll Br	Right	22.54	424	1.78	12	0.76
12h	Tric Br c l	Right	14.37	277	1.43	18.3	1.1	12h	Rect Femoris	Right	12.8	245	1.2	24	1.48	12h	Gastr c m	Right	13.03	210	1.4	26.9	1.62	12h	Deltoideus	Right	16.69	283	0.9	16	0.94	12h	Bic Fem c l	Right	15.75	281	1.53	18.5	1.13	12h	Abd Poll Br	Right	22.63	428	1.76	11.8	0.75
15h	Tric Br c l	Right	14.83	290	1.48	17.3	1.06	15h	Rect Femoris	Right	12.79	233	1.31	24.3	1.5	15h	Gastr c m	Right	13.08	207	1.25	26.3	1.59	15h	Deltoideus	Right	16.67	278	0.93	16.5	0.98	15h	Bic Fem c l	Right	13.47	264	1.42	20.1	1.23	15h	Abd Poll Br	Right	20.07	401	1.68	12.5	0.79
15h	Tric Br c l	Right	14.93	287	1.45	17.1	1.04	15h	Rect Femoris	Right	12.69	237	1.33	24.3	1.5	15h	Gastr c m	Right	13	207	1.28	26.4	1.61	15h	Deltoideus	Right	16.66	279	0.92	16.5	0.98	15h	Bic Fem c l	Right	13.77	260	1.4	20.1	1.23	15h	Abd Poll Br	Right	19.78	405	1.68	12.5	0.79
15h	Tric Br c l	Right	14.73	290	1.39	17.3	1.06	15h	Rect Femoris	Right	12.59	235	1.3	24.5	1.5	15h	Gastr c m	Right	13	209	1.25	26.3	1.6	15h	Deltoideus	Right	16.57	276	0.91	16.8	1	15h	Bic Fem c l	Right	13.48	261	1.37	20.1	1.23	15h	Abd Poll Br	Right	19.78	409	1.63	12.5	0.79
15h	Tric Br c l	Right	14.73	294	1.42	17.3	1.06	15h	Rect Femoris	Right	12.89	236	1.32	24.2	1.5	15h	Gastr c m	Right	13	209	1.26	26.3	1.6	15h	Deltoideus	Right	16.85	278	0.91	16.4	0.97	15h	Bic Fem c l	Right	13.48	262	1.37	20.2	1.23	15h	Abd Poll Br	Right	20.17	404	1.63	12.5	0.79
15h	Tric Br c l	Right	15.02	301	1.45	16.8	1.03	15h	Rect Femoris	Right	12.69	234	1.31	24.5	1.51	15h	Gastr c m	Right	12.9	209	1.27	26.4	1.61	15h	Deltoideus	Right	16.76	281	0.91	16.5	0.98	15h	Bic Fem c l	Right	13.86	264	1.4	20	1.22	15h	Abd Poll Br	Right	20.17	404	1.62	12.7	0.8
18h	Tric Br c l	Right	13.34	233	1.33	21.8	1.33	18h	Rect Femoris	Right	12.55	232	1.33	25.1	1.55	18h	Gastr c m	Right	14.53	219	1.14	22.6	1.35	18h	Deltoideus	Right	17.14	286	1.01	16.3	0.97	18h	Bic Fem c l	Right	13.84	272	1.38	19	1.16	18h	Abd Poll Br	Right	23.09	482	1.85	10.8	0.7
18h	Tric Br c l	Right	13.34	232	1.3	22.1	1.34	18h	Rect Femoris	Right	12.46	239	1.36	24.9	1.55	18h	Gastr c m	Right	14.53	220	1.09	22.6	1.35	18h	Deltoideus	Right	16.56	279	0.95	16.4	0.97	18h	Bic Fem c l	Right	13.64	264	1.31	19.3	1.16	18h	Abd Poll Br	Right	23.08	490	1.79	10.8	0.7
18h	Tric Br c l	Right	13.54	238	1.3	21.4	1.3	18h	Rect Femoris	Right	12.55	238	1.34	24.7	1.54	18h	Gastr c m	Right	14.43	218	1.12	22.7	1.36	18h	Deltoideus	Right	16.56	276	0.96	16.5	0.97	18h	Bic Fem c l	Right	13.64	263	1.29	19	1.14	18h	Abd Poll Br	Right	22.89	494	1.75	10.6	0.69
18h	Tric Br c l	Right	13.44	237	1.3	21.5	1.31	18h	Rect Femoris	Right	12.55	238	1.32	24.7	1.54	18h	Gastr c m	Right	14.53	219	1.11	22.6	1.34	18h	Deltoideus	Right	16.55	276	0.97	16.5	0.97	18h	Bic Fem c l	Right	13.54	262	1.29	19.4	1.17	18h	Abd Poll Br	Right	22.91	503	1.76	10.6	0.69
18h	Tric Br c l	Right	13.63	239	1.31	21.5	1.31	18h	Rect Femoris	Right	12.46	238	1.34	24.8	1.54	18h	Gastr c m	Right	14.53	221	1.08	22.3	1.33	18h	Deltoideus	Right	16.55	276	0.96	16.5	0.98	18h	Bic Fem c l	Right	13.44	259	1.29	19.5	1.16	18h	Abd Poll Br	Right	22.89	501	1.73	10.5	0.68

## Sheet: Participant_6
Time	Object	Side	Frequency	Stiffness	Decrement	Relaxation	Creep	Time	Object	Side	Frequency	Stiffness	Decrement	Relaxation	Creep	Time	Object	Side	Frequency	Stiffness	Decrement	Relaxation	Creep	Time	Object	Side	Frequency	Stiffness	Decrement	Relaxation	Creep	Time	Object	Side	Frequency	Stiffness	Decrement	Relaxation	Creep	Time	Object	Side	Frequency	Stiffness	Decrement	Relaxation	Creep
9h	Tric Br c l	Left	14.04	250	1.21	19.6	1.18	9h	Rect Femoris	Left	14.91	263	1.11	20	1.24	9h	Gastr c m	Left	14.74	246	1.36	22.3	1.37	9h	Deltoideus	Left	14.72	238	0.92	19.3	1.14	9h	Bic Fem c l	Left	15.51	272	1.28	19.9	1.23	9h	Abd Poll Br	Left	22.94	415	2.12	12.7	0.82
9h	Tric Br c l	Left	14.23	259	1.23	18.9	1.13	9h	Rect Femoris	Left	14.82	262	1.11	19.9	1.23	9h	Gastr c m	Left	14.16	240	1.32	22.3	1.36	9h	Deltoideus	Left	14.62	237	0.91	19.3	1.15	9h	Bic Fem c l	Left	15.5	273	1.27	19.7	1.22	9h	Abd Poll Br	Left	22.76	420	2.11	12.5	0.8
9h	Tric Br c l	Left	14.52	262	1.24	18.9	1.14	9h	Rect Femoris	Left	14.72	264	1.09	20	1.23	9h	Gastr c m	Left	13.96	244	1.33	22.4	1.37	9h	Deltoideus	Left	14.52	231	0.91	19.4	1.14	9h	Bic Fem c l	Left	15.3	262	1.21	20.3	1.25	9h	Abd Poll Br	Left	23.06	423	2.13	12.5	0.81
9h	Tric Br c l	Left	14.72	265	1.24	18.6	1.13	9h	Rect Femoris	Left	14.72	264	1.07	20	1.24	9h	Gastr c m	Left	13.86	244	1.34	22.6	1.38	9h	Deltoideus	Left	14.33	230	0.93	19.2	1.11	9h	Bic Fem c l	Left	15.31	270	1.27	20	1.23	9h	Abd Poll Br	Left	23.34	424	2.13	12.5	0.81
9h	Tric Br c l	Left	14.43	260	1.19	19	1.15	9h	Rect Femoris	Left	14.82	264	1.12	19.9	1.23	9h	Gastr c m	Left	13.76	239	1.35	23	1.41	9h	Deltoideus	Left	14.52	235	0.89	19.5	1.15	9h	Bic Fem c l	Left	15.12	260	1.24	20.6	1.27	9h	Abd Poll Br	Left	23.34	426	2.18	12.5	0.81
9h	Tric Br c l	Right	15.11	281	1.43	18.3	1.13	9h	Rect Femoris	Right	14.52	259	1.1	19.1	1.15	9h	Gastr c m	Right	12.89	212	1.38	24.1	1.44	9h	Deltoideus	Right	15.29	253	0.91	19.2	1.16	9h	Bic Fem c l	Right	15.98	277	1.4	17.8	1.08	9h	Abd Poll Br	Right	16.56	300	1.45	16	0.98
9h	Tric Br c l	Right	15.01	273	1.4	18.2	1.11	9h	Rect Femoris	Right	14.43	260	1.14	19.3	1.17	9h	Gastr c m	Right	12.99	209	1.31	24	1.42	9h	Deltoideus	Right	15.11	252	0.9	19.4	1.18	9h	Bic Fem c l	Right	15.99	280	1.39	17.6	1.07	9h	Abd Poll Br	Right	16.56	302	1.42	16	0.98
9h	Tric Br c l	Right	14.82	264	1.37	18.7	1.13	9h	Rect Femoris	Right	14.62	269	1.13	19.2	1.17	9h	Gastr c m	Right	12.99	211	1.3	24.1	1.44	9h	Deltoideus	Right	14.91	247	0.9	19.7	1.2	9h	Bic Fem c l	Right	16.27	288	1.38	17.4	1.06	9h	Abd Poll Br	Right	16.85	306	1.4	16	0.99
9h	Tric Br c l	Right	14.91	264	1.34	18.6	1.12	9h	Rect Femoris	Right	14.52	271	1.11	19.2	1.18	9h	Gastr c m	Right	12.99	210	1.28	24	1.42	9h	Deltoideus	Right	14.9	249	0.9	19.8	1.21	9h	Bic Fem c l	Right	16.56	296	1.36	17.1	1.05	9h	Abd Poll Br	Right	16.75	304	1.41	15.8	0.97
9h	Tric Br c l	Right	15.2	264	1.33	18.7	1.14	9h	Rect Femoris	Right	14.33	265	1.06	19.5	1.2	9h	Gastr c m	Right	12.8	208	1.3	24.4	1.46	9h	Deltoideus	Right	14.71	244	0.91	20.1	1.23	9h	Bic Fem c l	Right	16.17	289	1.35	17.6	1.08	9h	Abd Poll Br	Right	16.67	303	1.39	16	0.98
12h	Tric Br c l	Left	14.34	250	1.26	18.9	1.13	12h	Rect Femoris	Left	14.43	250	1.11	20.9	1.29	12h	Gastr c m	Left	13.77	239	1.46	23.7	1.46	12h	Deltoideus	Left	15.11	242	0.97	19.5	1.17	12h	Bic Fem c l	Left	15.7	280	1.3	18.7	1.15	12h	Abd Poll Br	Left	17.34	347	1.64	14.3	0.9
12h	Tric Br c l	Left	14.05	239	1.21	19.1	1.12	12h	Rect Femoris	Left	14.43	252	1.1	21	1.3	12h	Gastr c m	Left	13.67	241	1.5	23.8	1.46	12h	Deltoideus	Left	15.12	243	0.96	19.3	1.16	12h	Bic Fem c l	Left	15.59	282	1.25	18.8	1.16	12h	Abd Poll Br	Left	17.44	357	1.62	13.9	0.87
12h	Tric Br c l	Left	14.14	244	1.21	19.2	1.13	12h	Rect Femoris	Left	14.33	248	1.06	21.2	1.3	12h	Gastr c m	Left	13.57	237	1.46	24	1.48	12h	Deltoideus	Left	15.2	240	0.95	19.2	1.15	12h	Bic Fem c l	Left	15.59	285	1.26	18.7	1.16	12h	Abd Poll Br	Left	17.54	360	1.64	13.9	0.87
12h	Tric Br c l	Left	14.14	245	1.22	19.3	1.14	12h	Rect Femoris	Left	14.62	258	1.12	20.4	1.26	12h	Gastr c m	Left	13.77	241	1.44	23.7	1.46	12h	Deltoideus	Left	15.2	248	0.97	19.2	1.15	12h	Bic Fem c l	Left	15.6	282	1.26	18.8	1.16	12h	Abd Poll Br	Left	17.63	361	1.62	14	0.88
12h	Tric Br c l	Left	14.14	247	1.21	19	1.12	12h	Rect Femoris	Left	14.62	257	1.1	20.5	1.27	12h	Gastr c m	Left	13.67	240	1.4	23.4	1.44	12h	Deltoideus	Left	15.2	247	0.95	19.1	1.15	12h	Bic Fem c l	Left	15.79	285	1.25	18.8	1.16	12h	Abd Poll Br	Left	17.54	360	1.62	13.9	0.87
12h	Tric Br c l	Right	15.31	265	1.35	18.9	1.16	12h	Rect Femoris	Right	16.07	296	1.04	16.7	1.03	12h	Gastr c m	Right	13.66	205	1.4	23.8	1.39	12h	Deltoideus	Right	14.23	213	0.9	21	1.22	12h	Bic Fem c l	Right	17.44	315	1.33	16.2	1.01	12h	Abd Poll Br	Right	18.21	376	1.64	14.1	0.9
12h	Tric Br c l	Right	15.02	255	1.29	19.4	1.18	12h	Rect Femoris	Right	15.87	295	1.03	16.7	1.03	12h	Gastr c m	Right	13.77	207	1.39	23.6	1.39	12h	Deltoideus	Right	14.23	214	0.87	21	1.22	12h	Bic Fem c l	Right	17.25	313	1.25	16.5	1.02	12h	Abd Poll Br	Right	18.31	373	1.69	14.1	0.89
12h	Tric Br c l	Right	15.12	254	1.27	19.3	1.16	12h	Rect Femoris	Right	15.87	293	1.01	16.8	1.03	12h	Gastr c m	Right	13.86	208	1.35	23.5	1.38	12h	Deltoideus	Right	14.14	215	0.87	21.1	1.24	12h	Bic Fem c l	Right	17.63	320	1.31	16	0.99	12h	Abd Poll Br	Right	18.41	382	1.69	13.8	0.88
12h	Tric Br c l	Right	15.02	253	1.28	19.4	1.18	12h	Rect Femoris	Right	15.96	300	1.03	16.6	1.02	12h	Gastr c m	Right	13.86	210	1.32	23.8	1.4	12h	Deltoideus	Right	14.23	216	0.88	20.9	1.22	12h	Bic Fem c l	Right	17.63	321	1.3	16	0.99	12h	Abd Poll Br	Right	18.5	383	1.69	13.8	0.88
12h	Tric Br c l	Right	15.02	253	1.26	19.6	1.19	12h	Rect Femoris	Right	16.07	301	1.03	16.8	1.04	12h	Gastr c m	Right	13.96	214	1.36	23.2	1.38	12h	Deltoideus	Right	14.14	219	0.87	21.1	1.25	12h	Bic Fem c l	Right	17.63	320	1.31	16.2	1.01	12h	Abd Poll Br	Right	18.51	390	1.64	13.9	0.89
15h	Tric Br c l	Left	14.6	255	1.33	18.5	1.1	15h	Rect Femoris	Left	15.26	264	1.05	19.6	1.19	15h	Gastr c m	Left	14.21	235	1.48	23.1	1.42	15h	Deltoideus	Left	14.88	241	0.89	19.2	1.12	15h	Bic Fem c l	Left	15.38	268	1.31	19.4	1.19	15h	Abd Poll Br	Left	19.37	366	1.7	13.8	0.87
15h	Tric Br c l	Left	14.59	257	1.27	18.4	1.09	15h	Rect Femoris	Left	15.16	268	1.07	19.5	1.19	15h	Gastr c m	Left	14.21	231	1.53	23.1	1.41	15h	Deltoideus	Left	15.17	245	0.91	19.1	1.12	15h	Bic Fem c l	Left	15.48	277	1.31	19.3	1.19	15h	Abd Poll Br	Left	18.88	364	1.6	13.8	0.87
15h	Tric Br c l	Left	14.3	252	1.26	18.9	1.13	15h	Rect Femoris	Left	15.26	272	1.08	19.4	1.19	15h	Gastr c m	Left	14.31	239	1.46	23.2	1.43	15h	Deltoideus	Left	15.16	252	0.91	19.2	1.14	15h	Bic Fem c l	Left	15.48	270	1.29	19.1	1.17	15h	Abd Poll Br	Left	19.17	370	1.61	13.7	0.87
15h	Tric Br c l	Left	14.2	241	1.23	19.1	1.13	15h	Rect Femoris	Left	15.26	270	1.05	19.4	1.19	15h	Gastr c m	Left	14.12	230	1.49	23.5	1.44	15h	Deltoideus	Left	15.26	246	0.87	19	1.12	15h	Bic Fem c l	Left	15.48	276	1.27	19.2	1.18	15h	Abd Poll Br	Left	18.59	373	1.6	13.5	0.85
15h	Tric Br c l	Left	14.3	253	1.26	18.6	1.11	15h	Rect Femoris	Left	15.16	271	1.05	19.4	1.18	15h	Gastr c m	Left	14.21	232	1.5	23.3	1.43	15h	Deltoideus	Left	15.26	253	0.86	19.1	1.13	15h	Bic Fem c l	Left	15.58	278	1.3	19.1	1.18	15h	Abd Poll Br	Left	18.39	372	1.58	13.6	0.86
15h	Tric Br c l	Right	14.98	277	1.32	17.8	1.09	15h	Rect Femoris	Right	14.76	265	1.22	19.5	1.19	15h	Gastr c m	Right	13.73	211	1.45	24.3	1.46	15h	Deltoideus	Right	15.17	251	0.91	19.4	1.15	15h	Bic Fem c l	Right	17.24	310	1.33	16.5	1.02	15h	Abd Poll Br	Right	17.52	355	1.79	14.5	0.91
15h	Tric Br c l	Right	15.17	290	1.32	17.3	1.06	15h	Rect Femoris	Right	14.96	270	1.23	19.4	1.18	15h	Gastr c m	Right	13.72	212	1.45	24.1	1.44	15h	Deltoideus	Right	15.07	253	0.9	19.3	1.15	15h	Bic Fem c l	Right	17.13	310	1.36	16.6	1.03	15h	Abd Poll Br	Right	17.33	362	1.78	14.4	0.9
15h	Tric Br c l	Right	15.17	288	1.31	17.6	1.08	15h	Rect Femoris	Right	15.16	273	1.24	19	1.16	15h	Gastr c m	Right	13.44	216	1.44	24.5	1.48	15h	Deltoideus	Right	15.07	249	0.88	19.4	1.15	15h	Bic Fem c l	Right	17.03	310	1.33	16.5	1.02	15h	Abd Poll Br	Right	17.42	362	1.76	14.3	0.9
15h	Tric Br c l	Right	15.08	283	1.33	17.5	1.07	15h	Rect Femoris	Right	15.15	274	1.22	19	1.16	15h	Gastr c m	Right	13.62	213	1.45	24.1	1.45	15h	Deltoideus	Right	14.97	244	0.86	19.1	1.11	15h	Bic Fem c l	Right	17.13	309	1.32	16.7	1.03	15h	Abd Poll Br	Right	17.52	364	1.78	14.2	0.89
15h	Tric Br c l	Right	15.27	294	1.32	17.3	1.05	15h	Rect Femoris	Right	15.06	271	1.2	19.2	1.17	15h	Gastr c m	Right	13.53	213	1.45	24.1	1.44	15h	Deltoideus	Right	14.77	242	0.86	19.5	1.14	15h	Bic Fem c l	Right	17.23	312	1.3	16.5	1.02	15h	Abd Poll Br	Right	17.7	367	1.77	14.1	0.88
18h	Tric Br c l	Left	14.5	258	1.27	18.9	1.13	18h	Rect Femoris	Left	14.88	263	1.03	19.2	1.17	18h	Gastr c m	Left	14.62	243	1.65	22.8	1.41	18h	Deltoideus	Left	15.17	251	0.87	19.7	1.18	18h	Bic Fem c l	Left	15.59	269	1.23	19.5	1.21	18h	Abd Poll Br	Left	18.47	321	1.7	16.3	1.01
18h	Tric Br c l	Left	14.31	252	1.24	19	1.12	18h	Rect Femoris	Left	14.79	263	1.01	19.5	1.19	18h	Gastr c m	Left	14.62	248	1.66	22.3	1.38	18h	Deltoideus	Left	14.98	239	0.9	19.9	1.17	18h	Bic Fem c l	Left	15.59	281	1.23	19.5	1.2	18h	Abd Poll Br	Left	18.47	313	1.62	16.3	1.01
18h	Tric Br c l	Left	14.12	251	1.22	19.2	1.13	18h	Rect Femoris	Left	14.79	266	1.02	19.4	1.18	18h	Gastr c m	Left	14.62	247	1.65	22.4	1.38	18h	Deltoideus	Left	14.79	241	0.9	19.9	1.17	18h	Bic Fem c l	Left	15.59	276	1.24	19.4	1.21	18h	Abd Poll Br	Left	18.37	311	1.61	16.6	1.03
18h	Tric Br c l	Left	14.4	254	1.2	19	1.12	18h	Rect Femoris	Left	14.89	267	1.03	19.4	1.17	18h	Gastr c m	Left	14.62	248	1.63	22.3	1.38	18h	Deltoideus	Left	14.88	236	0.89	19.7	1.16	18h	Bic Fem c l	Left	15.49	272	1.22	19.5	1.21	18h	Abd Poll Br	Left	18.37	310	1.58	16.6	1.03
18h	Tric Br c l	Left	14.31	251	1.2	19.2	1.13	18h	Rect Femoris	Left	14.89	267	1.03	19.4	1.18	18h	Gastr c m	Left	14.72	250	1.62	22.3	1.39	18h	Deltoideus	Left	14.98	245	0.9	19.6	1.16	18h	Bic Fem c l	Left	15.69	276	1.23	19.4	1.21	18h	Abd Poll Br	Left	18.27	313	1.59	16.5	1.02
18h	Tric Br c l	Right	14.98	267	1.38	18.9	1.15	18h	Rect Femoris	Right	14.79	269	1.01	18.6	1.12	18h	Gastr c m	Right	13.57	214	1.46	23.1	1.37	18h	Deltoideus	Right	14.89	240	0.91	20	1.18	18h	Bic Fem c l	Right	17.61	312	1.4	16.3	1.01	18h	Abd Poll Br	Right	17.68	363	1.75	14.2	0.88
18h	Tric Br c l	Right	14.88	265	1.35	19.2	1.16	18h	Rect Femoris	Right	14.7	269	1.01	18.7	1.13	18h	Gastr c m	Right	13.17	211	1.45	23.3	1.38	18h	Deltoideus	Right	14.79	248	0.91	20.2	1.21	18h	Bic Fem c l	Right	17.61	310	1.39	16.3	1.01	18h	Abd Poll Br	Right	17.6	356	1.72	14.4	0.89
18h	Tric Br c l	Right	15.07	269	1.36	18.9	1.15	18h	Rect Femoris	Right	14.5	270	1.04	18.8	1.14	18h	Gastr c m	Right	13.17	207	1.45	23.2	1.36	18h	Deltoideus	Right	15.18	250	0.91	19.4	1.15	18h	Bic Fem c l	Right	17.33	306	1.35	16.6	1.01	18h	Abd Poll Br	Right	17.5	353	1.71	14.5	0.9
18h	Tric Br c l	Right	14.89	266	1.31	19.1	1.15	18h	Rect Femoris	Right	14.6	265	0.99	19.2	1.16	18h	Gastr c m	Right	13.27	212	1.44	23.2	1.38	18h	Deltoideus	Right	15.08	253	0.9	19.6	1.17	18h	Bic Fem c l	Right	17.04	302	1.34	16.7	1.01	18h	Abd Poll Br	Right	17.29	357	1.69	14.6	0.91
18h	Tric Br c l	Right	14.69	263	1.28	19.5	1.18	18h	Rect Femoris	Right	14.6	267	1.02	18.9	1.13	18h	Gastr c m	Right	13.46	213	1.47	23.2	1.38	18h	Deltoideus	Right	15.08	251	0.91	19.5	1.16	18h	Bic Fem c l	Right	17.03	307	1.36	16.6	1.01	18h	Abd Poll Br	Right	17.49	358	1.68	14.6	0.91

## Sheet: Participant_7
Time	Object	Side	Frequency	Stiffness	Decrement	Relaxation	Creep	Time	Object	Side	Frequency	Stiffness	Decrement	Relaxation	Creep	Time	Object	Side	Frequency	Stiffness	Decrement	Relaxation	Creep	Time	Object	Side	Frequency	Stiffness	Decrement	Relaxation	Creep	Time	Object	Side	Frequency	Stiffness	Decrement	Relaxation	Creep	Time	Object	Side	Frequency	Stiffness	Decrement	Relaxation	Creep
9h	Tric Br c l	Left	12.03	178	1.2	23.4	1.27	9h	Rect Femoris	Left	14.16	260	1.27	21.4	1.32	9h	Gastr c m	Left	13.67	238	1.19	22.3	1.36	9h	Deltoideus	Left	16.78	321	1.12	14.3	0.87	9h	Bic Fem c br	Left	14.83	253	1.21	19.6	1.19	9h	Add Pollicis	Left	17.84	352	1.77	13.9	0.86
9h	Tric Br c l	Left	12.03	179	1.18	23.5	1.29	9h	Rect Femoris	Left	13.96	266	1.27	21.2	1.31	9h	Gastr c m	Left	13.68	237	1.17	22.4	1.37	9h	Deltoideus	Left	16.3	324	1.12	14.3	0.87	9h	Bic Fem c br	Left	14.83	254	1.2	19.5	1.18	9h	Add Pollicis	Left	18.03	361	1.73	13.7	0.85
9h	Tric Br c l	Left	11.93	176	1.15	23.8	1.3	9h	Rect Femoris	Left	14.16	272	1.29	20.9	1.29	9h	Gastr c m	Left	13.68	238	1.17	22.2	1.36	9h	Deltoideus	Left	16.2	327	1.1	14.3	0.87	9h	Bic Fem c br	Left	14.93	256	1.21	19.5	1.18	9h	Add Pollicis	Left	17.94	360	1.7	13.8	0.86
9h	Tric Br c l	Left	11.84	174	1.14	23.9	1.3	9h	Rect Femoris	Left	14.06	268	1.28	21.1	1.3	9h	Gastr c m	Left	13.68	238	1.19	22.5	1.38	9h	Deltoideus	Left	16	321	1.08	14.4	0.88	9h	Bic Fem c br	Left	15.12	260	1.24	19.3	1.17	9h	Add Pollicis	Left	17.93	359	1.7	13.7	0.85
9h	Tric Br c l	Left	12.02	182	1.21	23.2	1.26	9h	Rect Femoris	Left	14.16	268	1.24	21	1.29	9h	Gastr c m	Left	13.58	238	1.19	22.5	1.38	9h	Deltoideus	Left	15.72	314	1.11	14.7	0.89	9h	Bic Fem c br	Left	14.93	258	1.21	19.4	1.18	9h	Add Pollicis	Left	18.03	360	1.66	13.7	0.85
9h	Tric Br c l	Right	12.03	184	1.26	22.6	1.24	9h	Rect Femoris	Right	13.86	267	1.38	21.8	1.35	9h	Gastr c m	Right	13.76	240	1.07	23	1.41	9h	Deltoideus	Right	18.52	370	0.98	13.3	0.82	9h	Bic Fem c br	Right	15.12	260	1.26	19.2	1.16	12h	Abd Poll Br	Left	21.38	359	1.61	13.9	0.86
9h	Tric Br c l	Right	11.93	181	1.2	23	1.26	9h	Rect Femoris	Right	13.77	268	1.33	22	1.37	9h	Gastr c m	Right	13.47	232	1.07	23.7	1.45	9h	Deltoideus	Right	18.92	385	0.97	12.9	0.8	9h	Bic Fem c br	Right	15.02	260	1.26	19.4	1.18	12h	Abd Poll Br	Left	21.2	354	1.6	13.8	0.85
9h	Tric Br c l	Right	12.03	185	1.2	22.5	1.23	9h	Rect Femoris	Right	13.38	264	1.31	22.3	1.38	9h	Gastr c m	Right	13.38	230	1.05	23.9	1.47	9h	Deltoideus	Right	18.82	392	0.95	12.9	0.81	9h	Bic Fem c br	Right	14.73	255	1.23	19.7	1.19	12h	Abd Poll Br	Left	21.48	365	1.56	13.7	0.84
9h	Tric Br c l	Right	12.13	188	1.24	22.8	1.27	9h	Rect Femoris	Right	14.16	279	1.37	21.1	1.31	9h	Gastr c m	Right	13.29	226	1.04	23.8	1.45	9h	Deltoideus	Right	18.72	386	0.95	12.8	0.8	9h	Bic Fem c br	Right	14.73	247	1.22	19.6	1.17	12h	Abd Poll Br	Left	21.58	364	1.53	13.6	0.84
9h	Tric Br c l	Right	12.13	180	1.21	22.4	1.2	9h	Rect Femoris	Right	14.06	277	1.38	21.4	1.33	9h	Gastr c m	Right	13.38	227	1.03	23.6	1.44	9h	Deltoideus	Right	19.1	392	0.93	12.6	0.78	9h	Bic Fem c br	Right	14.73	254	1.24	19.9	1.21	12h	Abd Poll Br	Left	21.48	367	1.54	13.5	0.83
12h	Tric Br c l	Left	12.64	222	1.2	20.2	1.14	12h	Rect Femoris	Left	13.31	252	1.21	21.9	1.32	12h	Gastr c m	Left	13.14	216	1.25	23.1	1.39	12h	Deltoideus	Left	23.9	587	1.1	8.9	0.57	12h	Bic Fem c l	Left	12.94	216	1.04	22.8	1.35	15h	Abd Poll Br	Left	23.28	379	2	13.1	0.82
12h	Tric Br c l	Left	12.53	218	1.19	20.8	1.18	12h	Rect Femoris	Left	13.31	254	1.21	22	1.33	12h	Gastr c m	Left	13.14	219	1.22	23.2	1.4	12h	Deltoideus	Left	23.13	595	1.09	8.9	0.58	12h	Bic Fem c l	Left	12.84	213	1	23.2	1.38	15h	Abd Poll Br	Left	23.09	385	1.94	13	0.82
12h	Tric Br c l	Left	12.53	215	1.16	20.9	1.19	12h	Rect Femoris	Left	13.01	241	1.18	22.1	1.32	12h	Gastr c m	Left	13.14	223	1.21	22.9	1.38	12h	Deltoideus	Left	23.71	604	1.1	8.7	0.57	12h	Bic Fem c l	Left	12.74	210	0.98	23.4	1.39	15h	Abd Poll Br	Left	23.48	391	1.95	12.8	0.81
12h	Tric Br c l	Left	12.44	216	1.18	20.8	1.17	12h	Rect Femoris	Left	13.11	245	1.18	22.1	1.32	12h	Gastr c m	Left	13.24	219	1.23	22.8	1.37	12h	Deltoideus	Left	23.32	614	1.1	8.7	0.57	12h	Bic Fem c l	Left	12.84	210	0.97	23.5	1.4	15h	Abd Poll Br	Left	23.19	388	1.92	12.9	0.81
12h	Tric Br c l	Left	12.43	218	1.17	20.7	1.18	12h	Rect Femoris	Left	13.21	247	1.19	21.9	1.32	12h	Gastr c m	Left	13.14	215	1.22	22.7	1.35	12h	Deltoideus	Left	23.61	618	1.11	8.6	0.56	12h	Bic Fem c l	Left	12.84	214	1	23.3	1.39	15h	Abd Poll Br	Left	23.46	391	1.9	12.9	0.81
12h	Tric Br c l	Right	11.07	169	1.11	28.8	1.63	12h	Rect Femoris	Right	13.6	256	1.28	21.9	1.33	12h	Gastr c m	Right	13.82	243	1.12	23	1.43	12h	Deltoideus	Right	19.43	419	1.17	12.2	0.76	12h	Bic Fem c l	Right	12.06	193	1.07	26.5	1.56	18h	Abd Poll Br	Left	20.8	389	1.54	13.1	0.82
12h	Tric Br c l	Right	10.98	165	1.08	28.9	1.61	12h	Rect Femoris	Right	13.5	258	1.28	21.7	1.32	12h	Gastr c m	Right	13.82	247	1.14	23	1.43	12h	Deltoideus	Right	19.83	422	1.15	12.1	0.75	12h	Bic Fem c l	Right	11.97	196	1.08	26.8	1.62	18h	Abd Poll Br	Left	20.61	399	1.54	12.8	0.8
12h	Tric Br c l	Right	10.89	161	1.05	29.4	1.64	12h	Rect Femoris	Right	13.5	259	1.3	21.8	1.33	12h	Gastr c m	Right	13.82	246	1.16	23	1.43	12h	Deltoideus	Right	19.82	420	1.11	12.1	0.75	12h	Bic Fem c l	Right	12.15	202	1.08	26.4	1.6	18h	Abd Poll Br	Left	20.9	402	1.48	12.6	0.79
12h	Tric Br c l	Right	10.98	172	1.07	29.3	1.68	12h	Rect Femoris	Right	13.6	258	1.27	21.8	1.33	12h	Gastr c m	Right	13.82	246	1.16	23.1	1.44	12h	Deltoideus	Right	19.91	424	1.15	12.1	0.75	12h	Bic Fem c l	Right	12.15	201	1.07	26.5	1.6	18h	Abd Poll Br	Left	20.8	412	1.5	12.8	0.8
12h	Tric Br c l	Right	10.98	168	1.06	29.2	1.66	12h	Rect Femoris	Right	13.4	256	1.26	21.8	1.32	12h	Gastr c m	Right	13.82	245	1.18	23	1.43	12h	Deltoideus	Right	19.92	427	1.12	12.1	0.75	12h	Bic Fem c l	Right	12.15	202	1.06	26.4	1.59	18h	Abd Poll Br	Left	20.9	410	1.48	12.6	0.79
15h	Tric Br c l	Left	11.34	172	1.09	26.4	1.5	15h	Rect Femoris	Left	12.3	201	1.02	23.4	1.34	15h	Gastr c m	Left	13.78	215	1.32	23.6	1.41	15h	Deltoideus	Left	18.31	394	1.31	12	0.75	15h	Bic Fem c l	Left	11.74	169	0.87	24.9	1.38	9h	Add Pollicis	Right	19.49	389	1.82	12.9	0.81
15h	Tric Br c l	Left	11.34	177	1.08	26.5	1.51	15h	Rect Femoris	Left	12.4	208	1.02	23.5	1.37	15h	Gastr c m	Left	13.78	220	1.33	23	1.37	15h	Deltoideus	Left	18.51	408	1.3	11.9	0.74	15h	Bic Fem c l	Left	11.74	169	0.87	24.6	1.35	9h	Add Pollicis	Right	19.29	398	1.75	12.7	0.8
15h	Tric Br c l	Left	11.44	173	1.1	26.3	1.49	15h	Rect Femoris	Left	12.4	207	1.01	23.6	1.37	15h	Gastr c m	Left	13.87	218	1.3	23.2	1.38	15h	Deltoideus	Left	18.41	410	1.31	11.7	0.73	15h	Bic Fem c l	Left	11.64	167	0.87	24.6	1.34	9h	Add Pollicis	Right	19.68	402	1.71	12.6	0.79
15h	Tric Br c l	Left	11.34	176	1.08	26.7	1.54	15h	Rect Femoris	Left	12.5	209	1.02	23.4	1.36	15h	Gastr c m	Left	13.78	224	1.33	23.4	1.41	15h	Deltoideus	Left	18.51	402	1.31	11.6	0.72	15h	Bic Fem c l	Left	11.64	168	0.84	24.5	1.33	9h	Add Pollicis	Right	19.67	406	1.73	12.4	0.78
15h	Tric Br c l	Left	11.24	170	1.07	26.6	1.49	15h	Rect Femoris	Left	12.5	209	1.01	23.3	1.35	15h	Gastr c m	Left	13.68	217	1.3	23.3	1.4	15h	Deltoideus	Left	18.51	411	1.3	11.6	0.72	15h	Bic Fem c l	Left	11.74	168	0.83	24.7	1.35	9h	Add Pollicis	Right	19.69	402	1.74	12.5	0.78
15h	Tric Br c l	Right	11.15	158	1.03	27.9	1.54	15h	Rect Femoris	Right	12.69	215	1.02	22.9	1.36	15h	Gastr c m	Right	13.49	239	1.15	23.5	1.44	15h	Deltoideus	Right	17.24	297	0.92	15.4	0.92	15h	Bic Fem c l	Right	11.54	172	0.93	27.3	1.55	12h	Abd Poll Br	Right	19.73	370	1.53	13	0.8
15h	Tric Br c l	Right	11.05	158	1.04	27.9	1.53	15h	Rect Femoris	Right	12.69	211	1.01	23.3	1.39	15h	Gastr c m	Right	13.39	231	1.13	23.6	1.44	15h	Deltoideus	Right	17.05	290	0.89	15.3	0.91	15h	Bic Fem c l	Right	11.54	180	0.91	27.7	1.62	12h	Abd Poll Br	Right	20.22	373	1.47	13.1	0.8
15h	Tric Br c l	Right	10.95	152	0.99	28	1.51	15h	Rect Femoris	Right	12.59	219	1.01	23.3	1.41	15h	Gastr c m	Right	13.29	233	1.14	23.5	1.44	15h	Deltoideus	Right	17.14	294	0.88	15.3	0.92	15h	Bic Fem c l	Right	11.54	180	0.92	27.8	1.63	12h	Abd Poll Br	Right	19.93	378	1.43	13.2	0.81
15h	Tric Br c l	Right	10.95	153	1.02	28.1	1.53	15h	Rect Femoris	Right	12.59	217	0.98	23.6	1.42	15h	Gastr c m	Right	13.2	234	1.16	23.6	1.44	15h	Deltoideus	Right	17.05	290	0.9	15.2	0.9	15h	Bic Fem c l	Right	11.54	181	0.92	27.8	1.63	12h	Abd Poll Br	Right	20.31	386	1.48	13.1	0.81
15h	Tric Br c l	Right	10.86	149	0.99	28	1.5	15h	Rect Femoris	Right	12.59	217	0.98	23.5	1.42	15h	Gastr c m	Right	13.48	234	1.17	23.5	1.44	15h	Deltoideus	Right	17.14	299	0.89	15.1	0.91	15h	Bic Fem c l	Right	11.64	177	0.94	27.3	1.57	12h	Abd Poll Br	Right	20.22	382	1.43	13	0.8
18h	Tric Br c l	Left	12.63	222	1.33	21	1.21	18h	Rect Femoris	Left	14.36	256	1.32	21.7	1.33	18h	Gastr c m	Left	13.43	222	1.2	23.4	1.43	18h	Deltoideus	Left	21.65	516	1.07	10.3	0.66	18h	Bic Fem c l	Left	12.55	199	0.94	24.7	1.45	15h	Abd Poll Br	Right	20.65	389	1.89	12.5	0.78
18h	Tric Br c l	Left	12.63	222	1.32	21	1.21	18h	Rect Femoris	Left	14.27	261	1.37	21.5	1.32	18h	Gastr c m	Left	13.33	224	1.21	23.1	1.4	18h	Deltoideus	Left	21.56	535	1.07	10	0.64	18h	Bic Fem c l	Left	12.64	207	0.95	24.5	1.45	15h	Abd Poll Br	Right	20.85	395	1.89	12.5	0.78
18h	Tric Br c l	Left	12.53	215	1.27	21	1.19	18h	Rect Femoris	Left	14.37	259	1.35	21.5	1.31	18h	Gastr c m	Left	13.34	223	1.21	23.1	1.41	18h	Deltoideus	Left	21.08	522	1.05	10	0.64	18h	Bic Fem c l	Left	12.55	208	0.96	24.6	1.47	15h	Abd Poll Br	Right	20.75	396	1.81	12.4	0.78
18h	Tric Br c l	Left	12.83	228	1.28	20.6	1.19	18h	Rect Femoris	Left	14.17	260	1.39	21.6	1.32	18h	Gastr c m	Left	13.34	225	1.23	23.1	1.41	18h	Deltoideus	Left	20.98	521	1.04	10.1	0.64	18h	Bic Fem c l	Left	12.55	200	0.93	24.6	1.45	15h	Abd Poll Br	Right	20.85	401	1.82	12.3	0.77
18h	Tric Br c l	Left	12.83	226	1.27	20.6	1.19	18h	Rect Femoris	Left	14.17	259	1.36	21.5	1.31	18h	Gastr c m	Left	13.43	224	1.22	23.3	1.42	18h	Deltoideus	Left	20.98	520	1.04	10.1	0.64	18h	Bic Fem c l	Left	12.54	200	0.93	24.4	1.42	15h	Abd Poll Br	Right	20.94	402	1.82	12.3	0.77
18h	Tric Br c l	Right	11.27	167	0.96	27.7	1.55	18h	Rect Femoris	Right	13.78	250	1.25	21.9	1.33	18h	Gastr c m	Right	13.62	238	1.24	23.5	1.45	18h	Deltoideus	Right	18.84	397	1.12	12.7	0.78	18h	Bic Fem c l	Right	11.76	193	1.07	26.6	1.56	18h	Abd Poll Br	Right	20.79	401	1.66	12.4	0.77
18h	Tric Br c l	Right	11.27	165	0.97	28.4	1.6	18h	Rect Femoris	Right	13.59	249	1.25	22	1.32	18h	Gastr c m	Right	13.53	238	1.24	23.6	1.46	18h	Deltoideus	Right	18.84	400	1.09	12.6	0.77	18h	Bic Fem c l	Right	11.77	192	1.05	26.9	1.58	18h	Abd Poll Br	Right	20.5	402	1.61	12.5	0.78
18h	Tric Br c l	Right	11.17	163	0.97	28	1.55	18h	Rect Femoris	Right	13.59	248	1.25	22.1	1.33	18h	Gastr c m	Right	13.43	238	1.25	23.6	1.46	18h	Deltoideus	Right	18.74	403	1.08	12.7	0.78	18h	Bic Fem c l	Right	11.85	189	1.05	27.2	1.6	18h	Abd Poll Br	Right	20.59	408	1.57	12.5	0.78
18h	Tric Br c l	Right	11.17	162	0.95	28.1	1.55	18h	Rect Femoris	Right	13.59	239	1.24	22.3	1.32	18h	Gastr c m	Right	13.43	240	1.25	23.7	1.47	18h	Deltoideus	Right	18.55	398	1.08	12.6	0.77	18h	Bic Fem c l	Right	11.95	189	1.03	26.9	1.58	18h	Abd Poll Br	Right	21.18	422	1.55	12.2	0.77
18h	Tric Br c l	Right	11.17	164	0.96	27.9	1.53	18h	Rect Femoris	Right	13.59	249	1.27	22.2	1.34	18h	Gastr c m	Right	13.43	238	1.22	23.7	1.47	18h	Deltoideus	Right	18.94	407	1.11	12.4	0.77	18h	Bic Fem c l	Right	11.96	195	1.03	26.8	1.59	18h	Abd Poll Br	Right	21.19	420	1.57	12.3	0.77

## Sheet: Participant_8
Time	Object	Side	Frequency	Stiffness	Decrement	Relaxation	Creep	Time	Object	Side	Frequency	Stiffness	Decrement	Relaxation	Creep	Time	Object	Side	Frequency	Stiffness	Decrement	Relaxation	Creep	Time	Object	Side	Frequency	Stiffness	Decrement	Relaxation	Creep	Time	Object	Side	Frequency	Stiffness	Decrement	Relaxation	Creep	Time	Object	Side	Frequency	Stiffness	Decrement	Relaxation	Creep
9h	Tric Br c l	Left	12.18	192	1.44	26.3	1.56	9h	Rect Femoris	Left	13.24	228	0.85	21.8	1.28	9h	Gastr c m	Left	14.21	233	1.08	22.7	1.37	9h	Deltoideus	Left	17.5	348	1.17	15.1	0.93	9h	Bic Fem c br	Left	15.18	253	1.27	19.3	1.15	9h	Add Pollicis	Left	22.53	388	1.83	12.9	0.8
9h	Tric Br c l	Left	11.89	191	1.41	26.2	1.54	9h	Rect Femoris	Left	13.24	230	0.86	22	1.31	9h	Gastr c m	Left	13.92	233	1.07	22.9	1.39	9h	Deltoideus	Left	17.69	357	1.16	14.8	0.92	9h	Bic Fem c br	Left	15.18	261	1.22	19.2	1.15	9h	Add Pollicis	Left	22.33	399	1.77	12.9	0.81
9h	Tric Br c l	Left	12.09	190	1.38	26.3	1.55	9h	Rect Femoris	Left	13.25	230	0.83	22	1.32	9h	Gastr c m	Left	14.01	230	1.02	22.7	1.38	9h	Deltoideus	Left	17.5	356	1.15	15	0.93	9h	Bic Fem c br	Left	15.28	262	1.22	19.1	1.15	9h	Add Pollicis	Left	22.62	400	1.81	12.7	0.79
9h	Tric Br c l	Left	12.08	184	1.4	26.2	1.54	9h	Rect Femoris	Left	13.25	232	0.85	22	1.31	9h	Gastr c m	Left	14.02	237	1.05	22.6	1.37	9h	Deltoideus	Left	17.49	354	1.1	15	0.93	9h	Bic Fem c br	Left	15.18	255	1.22	19.1	1.13	9h	Add Pollicis	Left	22.72	391	1.9	12.8	0.8
9h	Tric Br c l	Left	11.79	186	1.41	26.4	1.55	9h	Rect Femoris	Left	13.25	233	0.84	22.1	1.32	9h	Gastr c m	Left	14.02	233	1.02	22.6	1.37	9h	Deltoideus	Left	17.69	361	1.14	14.9	0.92	9h	Bic Fem c br	Left	15.18	254	1.26	19.2	1.14	9h	Add Pollicis	Left	22.82	392	1.89	12.9	0.8
9h	Tric Br c l	Right	12.08	181	1.11	25.1	1.42	9h	Rect Femoris	Right	13.25	236	1.11	22.8	1.38	9h	Gastr c m	Right	14.12	231	1.08	22.8	1.38	9h	Deltoideus	Right	15.18	250	0.94	18.1	1.06	9h	Bic Fem c br	Right	16.53	293	1.46	17.5	1.08	9h	Add Pollicis	Right	19.34	373	1.68	13.2	0.82
9h	Tric Br c l	Right	11.88	171	1.06	24.9	1.36	9h	Rect Femoris	Right	13.15	235	1.09	23.2	1.41	9h	Gastr c m	Right	13.92	232	1.05	23.2	1.41	9h	Deltoideus	Right	14.99	247	0.89	18.1	1.05	9h	Bic Fem c br	Right	16.33	292	1.41	17.8	1.09	9h	Add Pollicis	Right	19.14	376	1.66	13.2	0.82
9h	Tric Br c l	Right	12.18	179	1.11	24.5	1.35	9h	Rect Femoris	Right	13.05	233	1.1	23.2	1.4	9h	Gastr c m	Right	13.92	233	1.04	23	1.4	9h	Deltoideus	Right	15.47	261	0.91	17.2	1	9h	Bic Fem c br	Right	16.53	296	1.48	17.7	1.09	9h	Add Pollicis	Right	19.14	377	1.66	13.4	0.83
9h	Tric Br c l	Right	12.08	179	1.08	24.5	1.36	9h	Rect Femoris	Right	12.86	231	1.15	23.7	1.43	9h	Gastr c m	Right	13.73	230	1.05	23.3	1.42	9h	Deltoideus	Right	15.27	257	0.89	17.6	1.03	9h	Bic Fem c br	Right	16.53	298	1.47	17.4	1.07	9h	Add Pollicis	Right	19.04	375	1.61	13.4	0.83
9h	Tric Br c l	Right	12.08	181	1.05	24.2	1.35	9h	Rect Femoris	Right	12.86	230	1.11	23.7	1.42	9h	Gastr c m	Right	13.83	231	1.05	23.3	1.42	9h	Deltoideus	Right	15.37	259	0.89	17.4	1.01	9h	Bic Fem c br	Right	16.44	295	1.48	17.7	1.09	9h	Add Pollicis	Right	18.76	372	1.6	13.5	0.83
12h	Tric Br c l	Left	12.71	204	1.53	22.6	1.29	12h	Rect Femoris	Left	13.08	228	0.99	23.1	1.4	12h	Gastr c m	Left	13.31	231	1.36	24.1	1.48	12h	Deltoideus	Left	16.87	290	0.94	16.4	0.97	12h	Bic Fem c l	Left	14.17	259	1.05	20.4	1.23	12h	Abd Poll Br	Left	25.61	500	1.75	10.4	0.67
12h	Tric Br c l	Left	12.51	201	1.47	23.2	1.34	12h	Rect Femoris	Left	12.99	229	1.01	23.1	1.4	12h	Gastr c m	Left	13.5	234	1.35	23.7	1.45	12h	Deltoideus	Left	16.77	292	0.92	16.4	0.97	12h	Bic Fem c l	Left	14.07	251	1	20.4	1.22	12h	Abd Poll Br	Left	25.52	507	1.71	10.3	0.66
12h	Tric Br c l	Left	12.42	200	1.46	23.2	1.33	12h	Rect Femoris	Left	13	229	1.01	23.1	1.4	12h	Gastr c m	Left	13.4	241	1.35	23.8	1.46	12h	Deltoideus	Left	16.87	292	0.91	16.4	0.98	12h	Bic Fem c l	Left	14.07	252	1.04	20.4	1.22	12h	Abd Poll Br	Left	25.61	512	1.68	10.3	0.67
12h	Tric Br c l	Left	12.71	207	1.49	23	1.34	12h	Rect Femoris	Left	12.89	227	0.98	23.4	1.42	12h	Gastr c m	Left	13.4	243	1.35	23.6	1.45	12h	Deltoideus	Left	16.77	292	0.89	16.4	0.98	12h	Bic Fem c l	Left	14.07	257	1.05	20.4	1.23	12h	Abd Poll Br	Left	25.52	511	1.67	10.3	0.67
12h	Tric Br c l	Left	12.51	203	1.49	23	1.32	12h	Rect Femoris	Left	12.79	225	0.98	23.5	1.43	12h	Gastr c m	Left	13.5	243	1.37	23.5	1.44	12h	Deltoideus	Left	16.68	295	0.9	16.7	1	12h	Bic Fem c l	Left	14.08	249	1	20.4	1.22	12h	Abd Poll Br	Left	25.42	512	1.65	10.3	0.67
12h	Tric Br c l	Right	12.81	218	1.04	23.1	1.38	12h	Rect Femoris	Right	13.1	227	1.06	23.4	1.41	12h	Gastr c m	Right	13.6	234	1.2	23.5	1.44	12h	Deltoideus	Right	15.52	242	0.82	18.4	1.07	12h	Bic Fem c l	Right	14.95	269	1.27	19.7	1.2	12h	Abd Poll Br	Right	19.69	415	1.5	12.4	0.78
12h	Tric Br c l	Right	12.81	213	1.02	23.1	1.35	12h	Rect Femoris	Right	13.1	229	1.06	23.4	1.42	12h	Gastr c m	Right	13.5	230	1.16	23.9	1.46	12h	Deltoideus	Right	15.52	242	0.8	18.4	1.07	12h	Bic Fem c l	Right	14.85	266	1.31	20	1.22	12h	Abd Poll Br	Right	19.4	415	1.45	12.6	0.79
12h	Tric Br c l	Right	12.71	211	0.99	23.2	1.37	12h	Rect Femoris	Right	13	233	1.05	23.1	1.41	12h	Gastr c m	Right	13.4	231	1.16	23.8	1.45	12h	Deltoideus	Right	15.42	238	0.78	18.1	1.04	12h	Bic Fem c l	Right	14.65	265	1.3	20.1	1.23	12h	Abd Poll Br	Right	19.22	409	1.45	12.6	0.79
12h	Tric Br c l	Right	12.61	210	0.98	23.2	1.36	12h	Rect Femoris	Right	13	230	1.02	23.4	1.42	12h	Gastr c m	Right	13.4	232	1.17	23.8	1.45	12h	Deltoideus	Right	15.42	237	0.78	18.3	1.05	12h	Bic Fem c l	Right	14.66	261	1.27	20.4	1.23	12h	Abd Poll Br	Right	19.6	418	1.47	12.4	0.78
12h	Tric Br c l	Right	12.71	211	0.99	23.3	1.36	12h	Rect Femoris	Right	13	236	1.03	23.4	1.44	12h	Gastr c m	Right	13.49	234	1.18	23.7	1.45	12h	Deltoideus	Right	15.23	236	0.77	18.3	1.04	12h	Bic Fem c l	Right	14.65	264	1.24	20	1.21	12h	Abd Poll Br	Right	19.69	422	1.48	12.4	0.78
15h	Tric Br c l	Left	12.66	215	1.49	23.3	1.38	15h	Rect Femoris	Left	12.65	214	1.09	24.8	1.51	15h	Gastr c m	Left	14.13	241	1.01	22.1	1.35	15h	Deltoideus	Left	18.98	432	1.21	12.8	0.82	15h	Bic Fem c l	Left	14.13	248	1.11	20.4	1.22	15h	Abd Poll Br	Left	23.95	461	1.73	11.1	0.72
15h	Tric Br c l	Left	12.56	206	1.42	23.7	1.4	15h	Rect Femoris	Left	12.65	215	1.14	24.8	1.5	15h	Gastr c m	Left	14.03	241	1.02	22.1	1.35	15h	Deltoideus	Left	18.78	435	1.17	12.6	0.81	15h	Bic Fem c l	Left	13.94	239	1.09	20.6	1.22	15h	Abd Poll Br	Left	24.15	461	1.72	11.3	0.72
15h	Tric Br c l	Left	12.57	207	1.42	23.8	1.41	15h	Rect Femoris	Left	12.64	217	1.16	24.6	1.49	15h	Gastr c m	Left	14.03	242	1.03	22.3	1.36	15h	Deltoideus	Left	18.69	433	1.15	12.8	0.82	15h	Bic Fem c l	Left	13.84	244	1.1	20.8	1.25	15h	Abd Poll Br	Left	24.15	458	1.7	11.4	0.73
15h	Tric Br c l	Left	12.65	208	1.44	23.2	1.35	15h	Rect Femoris	Left	12.55	214	1.13	24.9	1.51	15h	Gastr c m	Left	13.93	240	1.01	22.3	1.36	15h	Deltoideus	Left	19.18	451	1.16	12.3	0.79	15h	Bic Fem c l	Left	14.03	253	1.13	20.7	1.25	15h	Abd Poll Br	Left	23.66	458	1.71	11.3	0.72
15h	Tric Br c l	Left	12.46	211	1.41	23.7	1.4	15h	Rect Femoris	Left	12.55	213	1.08	24.9	1.51	15h	Gastr c m	Left	13.93	240	1.01	22.3	1.36	15h	Deltoideus	Left	19.08	446	1.16	12.6	0.81	15h	Bic Fem c l	Left	14.03	245	1.11	20.7	1.25	15h	Abd Poll Br	Left	24.15	463	1.68	11.3	0.73
15h	Tric Br c l	Right	12.46	214	1.08	23.5	1.4	15h	Rect Femoris	Right	12.65	226	1.19	24.6	1.52	15h	Gastr c m	Right	13.64	234	1.18	23.3	1.42	15h	Deltoideus	Right	15.77	266	0.96	17.2	1.02	15h	Bic Fem c l	Right	15.78	287	1.17	17.7	1.07	15h	Abd Poll Br	Right	18.7	379	1.63	13.4	0.84
15h	Tric Br c l	Right	12.27	207	1.08	23.7	1.39	15h	Rect Femoris	Right	12.45	214	1.2	25.2	1.53	15h	Gastr c m	Right	13.45	233	1.18	23.6	1.44	15h	Deltoideus	Right	15.77	265	0.95	16.8	0.99	15h	Bic Fem c l	Right	15.98	293	1.17	17.5	1.06	15h	Abd Poll Br	Right	18.99	383	1.57	13.2	0.83
15h	Tric Br c l	Right	12.27	206	1.05	23.8	1.41	15h	Rect Femoris	Right	12.45	214	1.14	25.3	1.54	15h	Gastr c m	Right	13.45	231	1.17	23.7	1.45	15h	Deltoideus	Right	15.86	270	0.94	16.6	0.98	15h	Bic Fem c l	Right	15.69	288	1.12	17.6	1.07	15h	Abd Poll Br	Right	18.6	374	1.56	13.4	0.84
15h	Tric Br c l	Right	12.36	216	1.1	23.6	1.41	15h	Rect Femoris	Right	12.45	213	1.15	25.1	1.51	15h	Gastr c m	Right	13.54	232	1.17	23.8	1.46	15h	Deltoideus	Right	15.77	270	0.94	16.9	1	15h	Bic Fem c l	Right	15.69	288	1.19	17.8	1.08	15h	Abd Poll Br	Right	18.5	371	1.55	13.5	0.84
15h	Tric Br c l	Right	12.36	210	1.08	23.4	1.37	15h	Rect Femoris	Right	12.35	212	1.16	25.5	1.54	15h	Gastr c m	Right	13.54	233	1.16	23.7	1.46	15h	Deltoideus	Right	15.48	263	0.93	17	1	15h	Bic Fem c l	Right	15.68	281	1.14	18.1	1.1	15h	Abd Poll Br	Right	18.41	371	1.53	13.5	0.84
18h	Tric Br c l	Left	12.61	202	1.41	22.8	1.3	18h	Rect Femoris	Left	13	218	1.01	23.1	1.38	18h	Gastr c m	Left	13.88	245	1.31	22.7	1.39	18h	Deltoideus	Left	17.64	352	1.19	14.7	0.9	18h	Bic Fem c l	Left	14.07	237	0.96	21.1	1.25	18h	Abd Poll Br	Left	24.54	491	1.79	10.9	0.7
18h	Tric Br c l	Left	12.41	201	1.37	23	1.31	18h	Rect Femoris	Left	12.79	224	1.03	23.3	1.4	18h	Gastr c m	Left	13.78	239	1.26	23	1.41	18h	Deltoideus	Left	17.94	363	1.17	14.4	0.89	18h	Bic Fem c l	Left	13.97	235	0.95	21.2	1.25	18h	Abd Poll Br	Left	24.84	504	1.73	10.7	0.69
18h	Tric Br c l	Left	12.41	195	1.35	23	1.29	18h	Rect Femoris	Left	13	221	1.02	23.1	1.38	18h	Gastr c m	Left	13.59	238	1.26	23.1	1.41	18h	Deltoideus	Left	17.93	367	1.16	14.4	0.89	18h	Bic Fem c l	Left	13.87	231	0.96	21.6	1.28	18h	Abd Poll Br	Left	24.74	505	1.72	10.7	0.69
18h	Tric Br c l	Left	12.41	193	1.35	23.3	1.32	18h	Rect Femoris	Left	12.9	219	1.03	23.3	1.39	18h	Gastr c m	Left	13.68	243	1.25	23.2	1.42	18h	Deltoideus	Left	18.03	369	1.18	14.4	0.89	18h	Bic Fem c l	Left	13.88	228	0.95	21.4	1.26	18h	Abd Poll Br	Left	24.64	509	1.72	10.6	0.69
18h	Tric Br c l	Left	12.32	193	1.34	23.2	1.31	18h	Rect Femoris	Left	13.29	234	1	22.6	1.37	18h	Gastr c m	Left	13.49	232	1.23	23.3	1.42	18h	Deltoideus	Left	18.22	372	1.17	14.1	0.87	18h	Bic Fem c l	Left	13.78	231	0.97	21.7	1.29	18h	Abd Poll Br	Left	25.13	514	1.71	10.6	0.69
18h	Tric Br c l	Right	12.5	197	1.14	23.9	1.38	18h	Rect Femoris	Right	13.39	243	1.08	22.6	1.38	18h	Gastr c m	Right	13.3	230	1.38	24.1	1.47	18h	Deltoideus	Right	15.6	255	0.93	17.8	1.05	18h	Bic Fem c l	Right	15.03	267	1.28	19.6	1.19	18h	Abd Poll Br	Right	21.54	399	1.55	12.9	0.81
18h	Tric Br c l	Right	12.51	202	1.13	23.8	1.39	18h	Rect Femoris	Right	13.39	243	1.04	22.6	1.38	18h	Gastr c m	Right	13.2	233	1.37	24	1.46	18h	Deltoideus	Right	15.52	255	0.91	17.7	1.04	18h	Bic Fem c l	Right	14.85	268	1.28	19.6	1.18	18h	Abd Poll Br	Right	21.14	403	1.51	12.9	0.81
18h	Tric Br c l	Right	12.51	190	1.12	23.2	1.29	18h	Rect Femoris	Right	13.49	248	1.07	22.3	1.37	18h	Gastr c m	Right	13.11	230	1.35	24.1	1.47	18h	Deltoideus	Right	15.6	257	0.92	17.3	1	18h	Bic Fem c l	Right	14.85	266	1.25	19.7	1.2	18h	Abd Poll Br	Right	21.25	409	1.49	13	0.82
18h	Tric Br c l	Right	12.6	199	1.08	23.5	1.35	18h	Rect Femoris	Right	13.49	240	1.08	22.3	1.36	18h	Gastr c m	Right	13.1	230	1.35	24.1	1.47	18h	Deltoideus	Right	15.61	259	0.94	17.3	1	18h	Bic Fem c l	Right	14.76	263	1.25	19.8	1.19	18h	Abd Poll Br	Right	21.24	405	1.49	12.9	0.81
18h	Tric Br c l	Right	12.32	192	1.1	23.6	1.34	18h	Rect Femoris	Right	13.49	248	1.07	22.4	1.38	18h	Gastr c m	Right	13.1	232	1.34	24.1	1.47	18h	Deltoideus	Right	15.7	261	0.95	17.2	1	18h	Bic Fem c l	Right	14.85	263	1.25	19.8	1.19	18h	Abd Poll Br	Right	21.64	418	1.49	12.6	0.79

## Sheet: Participant_9
Time	Object	Side	Frequency	Stiffness	Decrement	Relaxation	Creep	Time	Object	Side	Frequency	Stiffness	Decrement	Relaxation	Creep	Time	Object	Side	Frequency	Stiffness	Decrement	Relaxation	Creep	Time	Object	Side	Frequency	Stiffness	Decrement	Relaxation	Creep	Time	Object	Side	Frequency	Stiffness	Decrement	Relaxation	Creep	Time	Object	Side	Frequency	Stiffness	Decrement	Relaxation	Creep
9h	Tric Br c l	Left	13.07	211	1.37	20.6	1.17	9h	Rect Femoris	Left	14.04	264	1.25	20.5	1.28	9h	Gastr c m	Left	13.46	225	1.25	24.1	1.48	9h	Deltoideus	Left	18.69	365	0.91	13.2	0.81	9h	Bic Fem c br	Left	12.58	204	1.05	24.1	1.44	9h	Add Pollicis	Left	18.59	351	1.44	14.3	0.9
9h	Tric Br c l	Left	13.07	213	1.33	20.3	1.14	9h	Rect Femoris	Left	14.03	263	1.23	20.5	1.28	9h	Gastr c m	Left	13.36	228	1.25	24	1.48	9h	Deltoideus	Left	18.49	361	0.88	13.2	0.81	9h	Bic Fem c br	Left	12.49	212	1.11	24	1.45	9h	Add Pollicis	Left	18.98	370	1.49	13.7	0.86
9h	Tric Br c l	Left	13.26	215	1.31	20	1.12	9h	Rect Femoris	Left	13.84	254	1.19	20.8	1.29	9h	Gastr c m	Left	12.98	225	1.26	24.2	1.48	9h	Deltoideus	Left	18.39	366	0.9	13.2	0.81	9h	Bic Fem c br	Left	12.49	205	1.07	24.2	1.44	9h	Add Pollicis	Left	18.59	361	1.39	13.9	0.87
9h	Tric Br c l	Left	12.87	207	1.29	20.9	1.18	9h	Rect Femoris	Left	13.85	253	1.2	20.9	1.3	9h	Gastr c m	Left	12.78	222	1.29	24.3	1.49	9h	Deltoideus	Left	18.3	356	0.88	13.4	0.82	9h	Bic Fem c br	Left	12.39	204	1.09	24.5	1.47	9h	Add Pollicis	Left	18.2	350	1.4	14.1	0.88
9h	Tric Br c l	Left	12.98	208	1.3	20.3	1.13	9h	Rect Femoris	Left	13.83	262	1.22	20.8	1.3	9h	Gastr c m	Left	12.98	223	1.28	24.3	1.49	9h	Deltoideus	Left	18.4	355	0.85	13.4	0.82	9h	Bic Fem c br	Left	12.39	204	1.07	24.4	1.45	9h	Add Pollicis	Left	18.19	357	1.47	14.2	0.88
9h	Tric Br c l	Right	13.46	249	1.24	19.2	1.15	9h	Rect Femoris	Right	12.58	218	0.94	24	1.44	9h	Gastr c m	Right	13.07	213	1.1	24.2	1.47	9h	Deltoideus	Right	16.46	295	0.89	15.6	0.94	9h	Bic Fem c br	Right	13.36	213	1.09	23.1	1.37	9h	Add Pollicis	Right	18.98	354	1.33	13.8	0.86
9h	Tric Br c l	Right	13.07	242	1.2	19.7	1.17	9h	Rect Femoris	Right	12.49	212	0.95	23.8	1.38	9h	Gastr c m	Right	12.97	214	1.1	24.2	1.47	9h	Deltoideus	Right	17.14	308	0.88	15.2	0.92	9h	Bic Fem c br	Right	13.17	210	1.08	22.9	1.34	9h	Add Pollicis	Right	18.4	348	1.3	13.9	0.85
9h	Tric Br c l	Right	13.36	255	1.21	19.4	1.17	9h	Rect Femoris	Right	12.39	217	0.95	24.2	1.46	9h	Gastr c m	Right	12.68	209	1.08	24.9	1.5	9h	Deltoideus	Right	16.85	304	0.87	15.4	0.93	9h	Bic Fem c br	Right	13.26	210	1.08	22.8	1.32	9h	Add Pollicis	Right	18.3	346	1.27	14	0.86
9h	Tric Br c l	Right	13.26	245	1.18	19.6	1.16	9h	Rect Femoris	Right	12.39	212	0.92	24	1.39	9h	Gastr c m	Right	12.98	211	1.04	24.3	1.46	9h	Deltoideus	Right	16.56	296	0.88	15.4	0.92	9h	Bic Fem c br	Right	13.36	210	1.08	22.8	1.33	9h	Add Pollicis	Right	18.3	345	1.26	14	0.86
9h	Tric Br c l	Right	13.26	248	1.18	19.4	1.15	9h	Rect Femoris	Right	12.39	208	0.89	24.3	1.43	9h	Gastr c m	Right	13.08	214	1.07	24	1.45	9h	Deltoideus	Right	16.36	290	0.86	15.7	0.94	9h	Bic Fem c br	Right	13.26	207	1.07	22.9	1.34	9h	Add Pollicis	Right	18.4	346	1.25	14.1	0.87
12h	Tric Br c l	Left	13.83	247	1.49	18.9	1.1	12h	Rect Femoris	Left	13.71	249	1.39	21.8	1.35	12h	Gastr c m	Left	13.16	225	1.34	23.9	1.45	12h	Deltoideus	Left	19.96	414	0.97	12	0.75	12h	Bic Fem c l	Left	12.77	214	1.13	23.4	1.38	12h	Abd Poll Br	Left	19.88	376	1.56	13.5	0.85
12h	Tric Br c l	Left	13.54	250	1.43	18.9	1.1	12h	Rect Femoris	Left	13.62	248	1.37	22.1	1.38	12h	Gastr c m	Left	12.97	226	1.36	24.2	1.48	12h	Deltoideus	Left	19.85	415	0.97	12.1	0.75	12h	Bic Fem c l	Left	12.67	215	1.09	23.3	1.37	12h	Abd Poll Br	Left	19.96	377	1.55	13.4	0.84
12h	Tric Br c l	Left	13.73	246	1.4	18.6	1.07	12h	Rect Femoris	Left	13.73	250	1.35	21.8	1.35	12h	Gastr c m	Left	13.07	228	1.35	24	1.47	12h	Deltoideus	Left	19.96	415	0.98	12.1	0.76	12h	Bic Fem c l	Left	12.66	214	1.09	23.3	1.37	12h	Abd Poll Br	Left	20.37	383	1.54	13.4	0.84
12h	Tric Br c l	Left	13.73	247	1.4	18.5	1.07	12h	Rect Femoris	Left	13.73	253	1.35	21.8	1.35	12h	Gastr c m	Left	13.17	231	1.36	23.7	1.45	12h	Deltoideus	Left	20.35	425	0.97	11.8	0.74	12h	Bic Fem c l	Left	12.85	218	1.08	23.5	1.4	12h	Abd Poll Br	Left	19.98	380	1.54	13.5	0.85
12h	Tric Br c l	Left	13.54	247	1.4	18.6	1.08	12h	Rect Femoris	Left	13.81	253	1.36	21.7	1.35	12h	Gastr c m	Left	13.26	231	1.39	23.6	1.44	12h	Deltoideus	Left	19.96	420	0.97	11.9	0.74	12h	Bic Fem c l	Left	12.76	218	1.05	23.6	1.41	12h	Abd Poll Br	Left	20.56	378	1.62	13.5	0.85
12h	Tric Br c l	Right	13.44	248	1.27	20.1	1.21	12h	Rect Femoris	Right	12.74	231	1.05	22.6	1.37	12h	Gastr c m	Right	13.55	226	1.1	23.5	1.42	12h	Deltoideus	Right	17.91	345	0.98	14.3	0.88	12h	Bic Fem c l	Right	12.66	215	1.09	25	1.51	12h	Abd Poll Br	Right	18.31	333	1.3	14.3	0.87
12h	Tric Br c l	Right	13.53	245	1.22	19.9	1.2	12h	Rect Femoris	Right	12.74	231	1.05	22.6	1.37	12h	Gastr c m	Right	13.45	225	1.09	23.5	1.42	12h	Deltoideus	Right	17.82	350	0.99	14.1	0.87	12h	Bic Fem c l	Right	12.57	214	1.05	25	1.51	12h	Abd Poll Br	Right	18.31	336	1.26	14.2	0.87
12h	Tric Br c l	Right	13.34	249	1.21	20.1	1.22	12h	Rect Femoris	Right	12.74	233	1.04	22.6	1.37	12h	Gastr c m	Right	13.36	218	1.07	23.8	1.43	12h	Deltoideus	Right	17.62	338	0.95	14.4	0.88	12h	Bic Fem c l	Right	12.57	214	1.04	25.1	1.52	12h	Abd Poll Br	Right	18.41	340	1.28	14	0.86
12h	Tric Br c l	Right	13.24	241	1.19	20	1.19	12h	Rect Femoris	Right	12.84	228	1.05	22.3	1.34	12h	Gastr c m	Right	13.45	219	1.05	23.7	1.43	12h	Deltoideus	Right	17.52	342	0.93	14.5	0.89	12h	Bic Fem c l	Right	12.57	207	1.05	25	1.5	12h	Abd Poll Br	Right	18.5	352	1.25	13.9	0.86
12h	Tric Br c l	Right	13.24	236	1.19	20	1.18	12h	Rect Femoris	Right	12.84	234	1.05	22.4	1.36	12h	Gastr c m	Right	13.26	217	1.06	23.8	1.43	12h	Deltoideus	Right	17.43	332	0.93	14.6	0.89	12h	Bic Fem c l	Right	12.46	208	1.08	24.7	1.48	12h	Abd Poll Br	Right	18.41	335	1.24	14.3	0.87
15h	Tric Br c l	Left	12.62	211	1.32	21.1	1.18	15h	Rect Femoris	Left	13.68	240	1.25	21.7	1.32	15h	Gastr c m	Left	13.4	234	1.25	23	1.39	15h	Deltoideus	Left	18.71	357	0.84	13.4	0.81	15h	Bic Fem c l	Left	12.92	211	1.01	23.4	1.36	15h	Abd Poll Br	Left	20.09	445	1.7	12.3	0.79
15h	Tric Br c l	Left	12.23	205	1.29	21	1.17	15h	Rect Femoris	Left	13.78	241	1.24	21.7	1.32	15h	Gastr c m	Left	13.32	238	1.27	22.9	1.39	15h	Deltoideus	Left	18.9	371	0.86	13.1	0.8	15h	Bic Fem c l	Left	12.82	203	0.99	23.5	1.35	15h	Abd Poll Br	Left	19.71	453	1.67	12.3	0.79
15h	Tric Br c l	Left	12.61	212	1.28	20.8	1.17	15h	Rect Femoris	Left	13.58	239	1.21	21.9	1.34	15h	Gastr c m	Left	13.21	235	1.25	23.2	1.4	15h	Deltoideus	Left	18.82	369	0.82	13.2	0.8	15h	Bic Fem c l	Left	12.82	204	0.99	23.3	1.33	15h	Abd Poll Br	Left	20	452	1.63	12.3	0.79
15h	Tric Br c l	Left	12.61	207	1.26	20.9	1.16	15h	Rect Femoris	Left	13.57	238	1.2	21.9	1.33	15h	Gastr c m	Left	13.31	235	1.24	22.9	1.39	15h	Deltoideus	Left	18.53	364	0.84	13.3	0.8	15h	Bic Fem c l	Left	12.92	212	1.01	23.3	1.35	15h	Abd Poll Br	Left	19.7	440	1.6	12.6	0.81
15h	Tric Br c l	Left	12.51	203	1.26	21.1	1.17	15h	Rect Femoris	Left	13.58	238	1.22	21.9	1.33	15h	Gastr c m	Left	13.5	233	1.27	22.8	1.37	15h	Deltoideus	Left	18.43	364	0.8	13.3	0.81	15h	Bic Fem c l	Left	12.92	204	0.98	23.4	1.34	15h	Abd Poll Br	Left	19.51	445	1.6	12.4	0.79
15h	Tric Br c l	Right	13.19	241	1.23	20.4	1.22	15h	Rect Femoris	Right	12.61	225	1.17	23.1	1.39	15h	Gastr c m	Right	13.5	219	1.31	23.6	1.41	15h	Deltoideus	Right	16.09	276	0.96	16	0.93	15h	Bic Fem c l	Right	12.52	204	1.07	25.3	1.51	15h	Abd Poll Br	Right	19.12	362	1.15	13.2	0.81
15h	Tric Br c l	Right	13.1	236	1.19	20.6	1.22	15h	Rect Femoris	Right	12.51	220	1.14	23.1	1.37	15h	Gastr c m	Right	13.5	222	1.31	23.7	1.42	15h	Deltoideus	Right	15.9	284	0.91	16.1	0.95	15h	Bic Fem c l	Right	12.43	202	1.02	25.6	1.52	15h	Abd Poll Br	Right	18.92	362	1.13	13.2	0.8
15h	Tric Br c l	Right	12.99	236	1.19	20.8	1.23	15h	Rect Femoris	Right	12.5	221	1.16	23.2	1.39	15h	Gastr c m	Right	13.4	222	1.28	23.7	1.42	15h	Deltoideus	Right	16.19	284	0.91	16.1	0.95	15h	Bic Fem c l	Right	12.33	200	0.99	25.8	1.53	15h	Abd Poll Br	Right	19.11	363	1.13	13	0.79
15h	Tric Br c l	Right	12.9	228	1.17	21.1	1.24	15h	Rect Femoris	Right	12.61	229	1.1	23	1.38	15h	Gastr c m	Right	13.31	219	1.27	24	1.43	15h	Deltoideus	Right	16.09	283	0.92	16.1	0.95	15h	Bic Fem c l	Right	12.43	202	1.01	25.9	1.55	15h	Abd Poll Br	Right	19.41	366	1.14	13	0.79
15h	Tric Br c l	Right	12.8	237	1.18	20.9	1.24	15h	Rect Femoris	Right	12.61	220	1.1	23.4	1.4	15h	Gastr c m	Right	13.21	217	1.3	23.9	1.42	15h	Deltoideus	Right	16.28	279	0.89	16	0.94	15h	Bic Fem c l	Right	12.43	197	1.01	25.7	1.51	15h	Abd Poll Br	Right	19.02	366	1.13	13.1	0.8
18h	Tric Br c l	Left	13.08	203	1.37	21.5	1.2	18h	Rect Femoris	Left	13.96	258	1.24	20.5	1.26	18h	Gastr c m	Left	13.97	239	1.21	22.3	1.36	18h	Deltoideus	Left	18.9	377	1	13.1	0.8	18h	Bic Fem c l	Left	12.9	217	1.1	23.6	1.4	18h	Abd Poll Br	Left	19.01	393	1.52	13.2	0.83
18h	Tric Br c l	Left	12.9	200	1.32	21.3	1.18	18h	Rect Femoris	Left	13.96	259	1.25	20.5	1.26	18h	Gastr c m	Left	13.87	238	1.21	22.6	1.38	18h	Deltoideus	Left	18.9	373	0.97	12.9	0.79	18h	Bic Fem c l	Left	12.9	215	1.08	23.6	1.4	18h	Abd Poll Br	Left	18.82	398	1.49	13.1	0.82
18h	Tric Br c l	Left	13.08	206	1.34	21.4	1.2	18h	Rect Femoris	Left	13.87	253	1.25	20.6	1.26	18h	Gastr c m	Left	13.78	242	1.2	22.5	1.38	18h	Deltoideus	Left	18.71	372	0.99	13.1	0.8	18h	Bic Fem c l	Left	12.81	211	1.08	23.5	1.38	18h	Abd Poll Br	Left	19.4	406	1.44	12.9	0.81
18h	Tric Br c l	Left	12.99	208	1.33	21.3	1.21	18h	Rect Femoris	Left	13.96	253	1.22	20.5	1.25	18h	Gastr c m	Left	13.78	236	1.22	22.8	1.39	18h	Deltoideus	Left	18.61	366	0.99	13.1	0.79	18h	Bic Fem c l	Left	12.71	212	1.07	23.5	1.38	18h	Abd Poll Br	Left	19.68	413	1.42	12.7	0.8
18h	Tric Br c l	Left	13.08	209	1.33	21.3	1.2	18h	Rect Femoris	Left	13.96	259	1.22	20.7	1.27	18h	Gastr c m	Left	13.49	236	1.22	22.6	1.38	18h	Deltoideus	Left	18.8	369	0.97	13	0.79	18h	Bic Fem c l	Left	12.81	216	1.06	23.7	1.41	18h	Abd Poll Br	Left	19.5	414	1.44	12.7	0.8
18h	Tric Br c l	Right	13.28	233	1.29	21.6	1.3	18h	Rect Femoris	Right	12.71	226	1.04	22.7	1.37	18h	Gastr c m	Right	13.77	218	1.09	23.4	1.4	18h	Deltoideus	Right	16.09	268	0.91	17.1	1.01	18h	Bic Fem c l	Right	12.32	207	1.09	25.8	1.56	18h	Abd Poll Br	Right	18.8	409	1.6	12.8	0.81
18h	Tric Br c l	Right	13.29	237	1.29	21.2	1.29	18h	Rect Femoris	Right	12.71	219	1.01	22.9	1.37	18h	Gastr c m	Right	13.67	221	1.12	23.4	1.4	18h	Deltoideus	Right	15.8	266	0.88	16.9	0.99	18h	Bic Fem c l	Right	12.42	202	1.06	25.7	1.54	18h	Abd Poll Br	Right	18.71	413	1.59	12.7	0.8
18h	Tric Br c l	Right	13.19	237	1.27	21.2	1.28	18h	Rect Femoris	Right	12.61	221	1.05	22.9	1.37	18h	Gastr c m	Right	13.59	220	1.1	23.4	1.4	18h	Deltoideus	Right	16.09	267	0.89	16.9	0.99	18h	Bic Fem c l	Right	12.31	206	1.06	26.1	1.57	18h	Abd Poll Br	Right	18.53	414	1.57	12.8	0.81
18h	Tric Br c l	Right	13.19	233	1.26	20.9	1.24	18h	Rect Femoris	Right	12.6	219	1.02	23.1	1.38	18h	Gastr c m	Right	13.58	219	1.09	23.6	1.42	18h	Deltoideus	Right	16.09	264	0.89	17	0.99	18h	Bic Fem c l	Right	12.41	203	1.05	26.3	1.58	18h	Abd Poll Br	Right	18.72	417	1.61	12.7	0.81
18h	Tric Br c l	Right	12.99	229	1.22	21.5	1.27	18h	Rect Femoris	Right	12.51	218	1	23.2	1.39	18h	Gastr c m	Right	13.58	219	1.12	23.1	1.38	18h	Deltoideus	Right	16.2	271	0.9	17	1	18h	Bic Fem c l	Right	12.31	205	1.05	26	1.56	18h	Abd Poll Br	Right	18.8	414	1.58	12.8	0.81

## Sheet: Participant_10
Time	Object	Side	Frequency	Stiffness	Decrement	Relaxation	Creep	Time	Object	Side	Frequency	Stiffness	Decrement	Relaxation	Creep	Time	Object	Side	Frequency	Stiffness	Decrement	Relaxation	Creep	Time	Object	Side	Frequency	Stiffness	Decrement	Relaxation	Creep	Time	Object	Side	Frequency	Stiffness	Decrement	Relaxation	Creep	Time	Object	Side	Frequency	Stiffness	Decrement	Relaxation	Creep
9h	Tric Br c l	Left	12.84	210	1.02	20.8	1.15	9h	Rect Femoris	Left	13.21	217	1.14	23.1	1.36	9h	Gastr c m	Left	15.3	238	1.24	21.7	1.32	9h	Deltoideus	Left	14.09	190	0.77	21.2	1.15	9h	Bic Fem c br	Left	13.82	218	1.26	21.9	1.28	9h	Add Pollicis	Left	18.77	313	1.14	15.4	0.95
9h	Tric Br c l	Left	12.74	203	0.99	20.8	1.13	9h	Rect Femoris	Left	13.11	220	1.12	23.2	1.37	9h	Gastr c m	Left	15.2	241	1.23	21.4	1.3	9h	Deltoideus	Left	14.09	195	0.79	21.4	1.19	9h	Bic Fem c br	Left	13.82	221	1.18	22.3	1.33	9h	Add Pollicis	Left	18.58	304	1.13	15.1	0.91
9h	Tric Br c l	Left	12.64	201	0.98	21	1.16	9h	Rect Femoris	Left	13.3	226	1.17	22.8	1.35	9h	Gastr c m	Left	15.19	240	1.21	21.5	1.31	9h	Deltoideus	Left	14.09	196	0.78	21.3	1.18	9h	Bic Fem c br	Left	13.73	210	1.19	22	1.26	9h	Add Pollicis	Left	18.67	303	1.1	15.2	0.92
9h	Tric Br c l	Left	12.64	206	0.97	21.1	1.17	9h	Rect Femoris	Left	13.3	225	1.15	22.7	1.34	9h	Gastr c m	Left	15.09	236	1.2	21.8	1.32	9h	Deltoideus	Left	14.19	196	0.78	21.5	1.2	9h	Bic Fem c br	Left	13.82	217	1.18	22	1.29	9h	Add Pollicis	Left	18.58	308	1.08	15.2	0.92
9h	Tric Br c l	Left	12.64	198	0.95	20.9	1.15	9h	Rect Femoris	Left	13.3	223	1.14	23	1.36	9h	Gastr c m	Left	15.09	238	1.22	21.8	1.33	9h	Deltoideus	Left	14.19	198	0.77	21.1	1.17	9h	Bic Fem c br	Left	13.73	215	1.18	22.2	1.3	9h	Add Pollicis	Left	18.59	308	1.06	15.3	0.93
9h	Tric Br c l	Right	15.94	297	1.27	15.8	0.93	9h	Rect Femoris	Right	14.07	241	1.19	22.1	1.33	9h	Gastr c m	Right	15.87	255	1.06	20.8	1.29	9h	Deltoideus	Right	15.64	252	0.73	18.4	1.07	9h	Bic Fem c br	Right	14.31	257	1.14	20.5	1.25	9h	Add Pollicis	Right	22.47	406	1.38	12.5	0.8
9h	Tric Br c l	Right	15.75	297	1.23	15.8	0.92	9h	Rect Femoris	Right	14.17	243	1.19	21.7	1.31	9h	Gastr c m	Right	15.77	255	1.08	21	1.3	9h	Deltoideus	Right	15.54	255	0.73	18.3	1.07	9h	Bic Fem c br	Right	14.21	256	1.13	20.6	1.26	9h	Add Pollicis	Right	22.27	395	1.34	12.6	0.8
9h	Tric Br c l	Right	15.55	289	1.2	15.7	0.91	9h	Rect Femoris	Right	13.97	238	1.17	22.4	1.35	9h	Gastr c m	Right	15.77	254	1.07	21.1	1.31	9h	Deltoideus	Right	15.44	250	0.74	18.5	1.07	9h	Bic Fem c br	Right	14.21	256	1.12	20.6	1.26	9h	Add Pollicis	Right	22.18	397	1.33	12.7	0.79
9h	Tric Br c l	Right	15.64	296	1.21	15.8	0.92	9h	Rect Femoris	Right	14.07	243	1.14	21.7	1.31	9h	Gastr c m	Right	15.77	255	1.08	21	1.3	9h	Deltoideus	Right	15.44	244	0.71	18.6	1.07	9h	Bic Fem c br	Right	14.01	256	1.11	20.6	1.26	9h	Add Pollicis	Right	21.88	388	1.28	12.8	0.8
9h	Tric Br c l	Right	15.75	298	1.2	15.8	0.92	9h	Rect Femoris	Right	13.97	242	1.16	21.9	1.32	9h	Gastr c m	Right	15.67	254	1.08	21	1.3	9h	Deltoideus	Right	15.64	255	0.73	18.4	1.08	9h	Bic Fem c br	Right	14.31	257	1.12	20.5	1.25	9h	Add Pollicis	Right	22.08	390	1.3	12.9	0.82
12h	Tric Br c l	Left	11.35	148	0.85	27	1.43	12h	Rect Femoris	Left	13.48	237	1.2	22.6	1.38	12h	Gastr c m	Left	16.5	249	1.19	22.7	1.39	12h	Deltoideus	Left	14.64	223	0.81	19.6	1.12	12h	Bic Fem c l	Left	14.46	251	1.01	21	1.28	12h	Abd Poll Br	Left	19.02	406	1.46	12.4	0.78
12h	Tric Br c l	Left	11.35	148	0.83	26.9	1.42	12h	Rect Femoris	Left	13.48	238	1.16	22.6	1.38	12h	Gastr c m	Left	16.7	252	1.21	22.4	1.38	12h	Deltoideus	Left	14.64	222	0.78	19.5	1.11	12h	Bic Fem c l	Left	14.65	259	1.04	20.7	1.26	12h	Abd Poll Br	Left	19.5	410	1.4	12.4	0.78
12h	Tric Br c l	Left	11.44	150	0.86	26.3	1.39	12h	Rect Femoris	Left	13.39	237	1.16	22.7	1.39	12h	Gastr c m	Left	16.59	249	1.2	22.6	1.39	12h	Deltoideus	Left	14.54	215	0.77	19.6	1.1	12h	Bic Fem c l	Left	14.65	257	1.05	20.7	1.27	12h	Abd Poll Br	Left	19.21	408	1.39	12.4	0.78
12h	Tric Br c l	Left	11.53	151	0.85	26.3	1.39	12h	Rect Femoris	Left	13.49	238	1.19	22.5	1.37	12h	Gastr c m	Left	16.69	252	1.22	22.7	1.39	12h	Deltoideus	Left	14.44	214	0.78	19.8	1.12	12h	Bic Fem c l	Left	14.55	261	1.01	21	1.29	12h	Abd Poll Br	Left	19.02	408	1.37	12.6	0.79
12h	Tric Br c l	Left	11.64	157	0.85	26	1.39	12h	Rect Femoris	Left	13.58	249	1.19	22.3	1.37	12h	Gastr c m	Left	16.59	247	1.2	22.7	1.39	12h	Deltoideus	Left	14.45	212	0.77	19.3	1.07	12h	Bic Fem c l	Left	14.55	258	1.04	20.6	1.25	12h	Abd Poll Br	Left	19.21	411	1.39	12.4	0.78
12h	Tric Br c l	Right	15.13	264	1.13	17.4	1.01	12h	Rect Femoris	Right	13.38	223	1.11	22.7	1.34	12h	Gastr c m	Right	15.73	256	1.23	20.5	1.25	12h	Deltoideus	Right	13.86	205	0.78	21.8	1.24	12h	Bic Fem c l	Right	16.49	303	1.17	17.5	1.09	12h	Abd Poll Br	Right	20.65	422	1.38	12.1	0.77
12h	Tric Br c l	Right	14.93	263	1.09	17.1	0.98	12h	Rect Femoris	Right	13.29	227	1.13	22.5	1.34	12h	Gastr c m	Right	15.73	261	1.22	20.7	1.28	12h	Deltoideus	Right	13.97	203	0.79	21.3	1.2	12h	Bic Fem c l	Right	16.78	307	1.18	17.4	1.08	12h	Abd Poll Br	Right	20.37	426	1.32	12	0.76
12h	Tric Br c l	Right	15.12	263	1.08	17	0.98	12h	Rect Femoris	Right	13.18	219	1.08	22.6	1.33	12h	Gastr c m	Right	15.73	262	1.23	20.7	1.27	12h	Deltoideus	Right	13.96	203	0.78	21.1	1.18	12h	Bic Fem c l	Right	16.49	303	1.16	17.7	1.1	12h	Abd Poll Br	Right	20.47	426	1.33	12.1	0.77
12h	Tric Br c l	Right	15.32	268	1.1	16.8	0.96	12h	Rect Femoris	Right	13.28	225	1.08	22.4	1.32	12h	Gastr c m	Right	15.82	258	1.2	20.4	1.25	12h	Deltoideus	Right	13.96	199	0.76	21.1	1.18	12h	Bic Fem c l	Right	16.59	308	1.17	17.6	1.1	12h	Abd Poll Br	Right	20.47	431	1.37	12	0.76
12h	Tric Br c l	Right	15.02	269	1.05	17.3	1.01	12h	Rect Femoris	Right	13.39	226	1.09	22.3	1.32	12h	Gastr c m	Right	15.82	264	1.2	20.4	1.25	12h	Deltoideus	Right	13.96	205	0.76	21.3	1.21	12h	Bic Fem c l	Right	16.89	313	1.21	17.2	1.07	12h	Abd Poll Br	Right	20.37	429	1.34	12.1	0.77
15h	Tric Br c l	Left	12.79	192	1.02	21.1	1.15	15h	Rect Femoris	Left	12.98	211	1.2	23.3	1.37	15h	Gastr c m	Left	14.93	231	1.26	22.4	1.35	15h	Deltoideus	Left	14.05	188	0.77	21.4	1.18	15h	Bic Fem c l	Left	12.69	192	1.01	24.9	1.45	15h	Abd Poll Br	Left	19.37	402	1.45	12.5	0.79
15h	Tric Br c l	Left	12.98	196	1	20.7	1.13	15h	Rect Femoris	Left	12.98	216	1.2	23.5	1.39	15h	Gastr c m	Left	14.83	230	1.26	22.5	1.36	15h	Deltoideus	Left	14.05	191	0.76	21.2	1.17	15h	Bic Fem c l	Left	12.69	187	1.01	24.6	1.4	15h	Abd Poll Br	Left	19.67	394	1.37	12.7	0.8
15h	Tric Br c l	Left	12.88	186	1.04	21	1.13	15h	Rect Femoris	Left	12.98	212	1.2	23.4	1.37	15h	Gastr c m	Left	14.93	232	1.3	22.7	1.38	15h	Deltoideus	Left	14.05	193	0.75	21.5	1.21	15h	Bic Fem c l	Left	12.6	185	1.03	25.4	1.46	15h	Abd Poll Br	Left	19.57	401	1.39	12.6	0.8
15h	Tric Br c l	Left	12.88	190	1.02	20.6	1.1	15h	Rect Femoris	Left	12.98	219	1.21	23.3	1.38	15h	Gastr c m	Left	14.83	232	1.28	22.5	1.36	15h	Deltoideus	Left	13.95	194	0.75	21.5	1.21	15h	Bic Fem c l	Left	12.6	187	1.02	24.8	1.43	15h	Abd Poll Br	Left	19.48	394	1.36	12.7	0.8
15h	Tric Br c l	Left	12.88	192	1.01	21	1.14	15h	Rect Femoris	Left	13.08	222	1.26	23.4	1.39	15h	Gastr c m	Left	14.74	231	1.27	22.8	1.39	15h	Deltoideus	Left	14.05	190	0.73	21.4	1.19	15h	Bic Fem c l	Left	12.69	194	1	24.7	1.44	15h	Abd Poll Br	Left	19.28	388	1.35	12.9	0.82
15h	Tric Br c l	Right	14.24	239	1.08	17.7	0.99	15h	Rect Femoris	Right	13.36	223	1.08	23.1	1.39	15h	Gastr c m	Right	15.22	244	1.27	22.1	1.36	15h	Deltoideus	Right	15.4	243	0.74	18.8	1.1	15h	Bic Fem c l	Right	15.59	283	1.21	19.1	1.19	15h	Abd Poll Br	Right	21.32	437	1.35	11.7	0.75
15h	Tric Br c l	Right	14.53	244	1.05	17.4	0.98	15h	Rect Femoris	Right	13.37	228	1.14	22.9	1.38	15h	Gastr c m	Right	15.03	243	1.29	22.4	1.38	15h	Deltoideus	Right	15.11	244	0.75	19.4	1.16	15h	Bic Fem c l	Right	15.21	273	1.15	19.5	1.21	15h	Abd Poll Br	Right	21.32	443	1.32	11.6	0.74
15h	Tric Br c l	Right	14.43	245	1.06	17.4	0.98	15h	Rect Femoris	Right	13.46	225	1.09	23	1.38	15h	Gastr c m	Right	15.03	244	1.3	22.5	1.39	15h	Deltoideus	Right	15.11	243	0.74	19.6	1.17	15h	Bic Fem c l	Right	15.03	273	1.16	19.6	1.21	15h	Abd Poll Br	Right	21.41	444	1.32	11.7	0.74
15h	Tric Br c l	Right	14.24	236	1.05	17.5	0.97	15h	Rect Femoris	Right	13.57	229	1.14	22.9	1.39	15h	Gastr c m	Right	14.93	244	1.31	22.4	1.38	15h	Deltoideus	Right	15.3	247	0.75	19.2	1.14	15h	Bic Fem c l	Right	14.82	271	1.15	19.9	1.23	15h	Abd Poll Br	Right	21.41	447	1.33	11.6	0.74
15h	Tric Br c l	Right	14.24	234	1.07	17.8	0.99	15h	Rect Femoris	Right	13.46	228	1.14	23.1	1.4	15h	Gastr c m	Right	14.82	243	1.3	22.4	1.38	15h	Deltoideus	Right	15.4	249	0.77	19	1.12	15h	Bic Fem c l	Right	14.92	271	1.17	19.8	1.23	15h	Abd Poll Br	Right	21.41	448	1.32	11.6	0.74
18h	Tric Br c l	Left	11.34	141	0.87	26.5	1.36	18h	Rect Femoris	Left	13.87	246	1.18	22.3	1.37	18h	Gastr c m	Left	13.49	243	1.21	22.8	1.4	18h	Deltoideus	Left	14.26	210	0.82	20.6	1.17	18h	Bic Fem c l	Left	14.26	254	1.07	20.7	1.26	18h	Abd Poll Br	Left	24.72	489	1.61	10.7	0.69
18h	Tric Br c l	Left	11.35	147	0.87	26.9	1.41	18h	Rect Femoris	Left	13.87	250	1.19	22	1.35	18h	Gastr c m	Left	13.3	244	1.23	23	1.42	18h	Deltoideus	Left	14.26	205	0.82	20.4	1.14	18h	Bic Fem c l	Left	14.16	252	1.05	21	1.28	18h	Abd Poll Br	Left	24.72	496	1.61	10.6	0.68
18h	Tric Br c l	Left	11.44	151	0.87	26.8	1.42	18h	Rect Femoris	Left	13.87	247	1.16	22.2	1.37	18h	Gastr c m	Left	13.49	247	1.23	22.7	1.4	18h	Deltoideus	Left	14.26	206	0.78	20.3	1.14	18h	Bic Fem c l	Left	14.07	248	1.03	21.1	1.29	18h	Abd Poll Br	Left	25.01	499	1.67	10.6	0.69
18h	Tric Br c l	Left	11.44	147	0.88	26	1.34	18h	Rect Femoris	Left	13.77	242	1.14	22.1	1.35	18h	Gastr c m	Left	13.59	249	1.24	22.4	1.38	18h	Deltoideus	Left	14.26	208	0.82	20.1	1.12	18h	Bic Fem c l	Left	14.16	251	1.04	21.1	1.29	18h	Abd Poll Br	Left	25.21	504	1.6	10.5	0.68
18h	Tric Br c l	Left	11.54	152	0.88	26.4	1.4	18h	Rect Femoris	Left	13.77	249	1.16	22	1.35	18h	Gastr c m	Left	13.59	248	1.22	22.7	1.4	18h	Deltoideus	Left	14.26	205	0.8	20	1.11	18h	Bic Fem c l	Left	14.16	253	1.04	21	1.28	18h	Abd Poll Br	Left	25.31	506	1.61	10.5	0.68
18h	Tric Br c l	Right	14.15	237	1.03	18.6	1.06	18h	Rect Femoris	Right	13.57	229	1.08	22.3	1.33	18h	Gastr c m	Right	15.53	254	1.22	21.6	1.32	18h	Deltoideus	Right	13.77	207	0.78	21.8	1.25	18h	Bic Fem c l	Right	15.42	282	1.15	19	1.17	18h	Abd Poll Br	Right	21.34	437	1.41	11.7	0.74
18h	Tric Br c l	Right	14.16	233	1.03	18.4	1.03	18h	Rect Femoris	Right	13.57	235	1.08	22.4	1.35	18h	Gastr c m	Right	15.44	252	1.19	21.6	1.32	18h	Deltoideus	Right	13.86	203	0.77	21.3	1.19	18h	Bic Fem c l	Right	15.42	286	1.12	18.6	1.14	18h	Abd Poll Br	Right	21.33	442	1.36	11.6	0.74
18h	Tric Br c l	Right	14.26	233	1.05	18.5	1.04	18h	Rect Femoris	Right	13.67	230	1.07	22.2	1.33	18h	Gastr c m	Right	15.34	246	1.23	21.6	1.32	18h	Deltoideus	Right	13.86	207	0.77	21.8	1.25	18h	Bic Fem c l	Right	15.51	290	1.14	18.4	1.14	18h	Abd Poll Br	Right	21.52	445	1.39	11.5	0.73
18h	Tric Br c l	Right	14.26	235	1	18.4	1.04	18h	Rect Femoris	Right	13.57	230	1.06	22.2	1.32	18h	Gastr c m	Right	15.53	253	1.24	21.4	1.32	18h	Deltoideus	Right	13.86	206	0.77	21.8	1.24	18h	Bic Fem c l	Right	15.51	290	1.14	18.7	1.16	18h	Abd Poll Br	Right	21.35	441	1.39	11.6	0.74
18h	Tric Br c l	Right	14.07	232	1	18.7	1.06	18h	Rect Femoris	Right	13.57	236	1.05	22.3	1.34	18h	Gastr c m	Right	15.53	256	1.2	21.4	1.32	18h	Deltoideus	Right	13.77	208	0.77	21.7	1.23	18h	Bic Fem c l	Right	15.62	289	1.12	18.6	1.15	18h	Abd Poll Br	Right	21.32	440	1.36	11.7	0.74

## Sheet: Participant_11
Time	Object	Side	Frequency	Stiffness	Decrement	Relaxation	Creep	Time	Object	Side	Frequency	Stiffness	Decrement	Relaxation	Creep	Time	Object	Side	Frequency	Stiffness	Decrement	Relaxation	Creep	Time	Object	Side	Frequency	Stiffness	Decrement	Relaxation	Creep	Time	Object	Side	Frequency	Stiffness	Decrement	Relaxation	Creep	Time	Object	Side	Frequency	Stiffness	Decrement	Relaxation	Creep
9h	Tric Br c l	Left	14.38	211	0.97	22.4	1.31	9h	Rect Femoris	Left	17.17	307	1.29	18.2	1.14	9h	Abd Poll Br	Left	18.65	325	1.22	15.2	0.94	9h	Deltoideus	Left	15.82	251	0.78	18.5	1.08	9h	Bic Fem c l	Left	17.3	290	1.21	17.9	1.1	9h	Gastr c m	Left	15.46	235	1.05	21.8	1.33
9h	Tric Br c l	Left	14.37	206	0.94	22.2	1.28	9h	Rect Femoris	Left	17.08	307	1.31	18.2	1.14	9h	Abd Poll Br	Left	18.36	320	1.18	15.4	0.95	9h	Deltoideus	Left	15.63	247	0.77	18.9	1.11	9h	Bic Fem c l	Left	16.91	294	1.23	18.5	1.14	9h	Gastr c m	Left	15.46	237	1.07	21.8	1.33
9h	Tric Br c l	Left	14.37	213	0.93	22.2	1.31	9h	Rect Femoris	Left	17.27	310	1.33	18	1.13	9h	Abd Poll Br	Left	18.36	317	1.21	15.5	0.95	9h	Deltoideus	Left	15.54	248	0.77	19	1.12	9h	Bic Fem c l	Left	17.3	299	1.25	17.9	1.1	9h	Gastr c m	Left	15.46	238	1.05	21.6	1.31
9h	Tric Br c l	Left	14.38	218	0.9	22.2	1.31	9h	Rect Femoris	Left	17.27	310	1.33	17.9	1.12	9h	Abd Poll Br	Left	18.27	311	1.18	15.6	0.96	9h	Deltoideus	Left	15.53	245	0.74	19	1.11	9h	Bic Fem c l	Left	17.4	301	1.24	17.6	1.08	9h	Gastr c m	Left	15.46	240	1.08	21.9	1.35
9h	Tric Br c l	Left	14.38	220	0.91	22.2	1.32	9h	Rect Femoris	Left	17.37	312	1.32	17.9	1.12	9h	Abd Poll Br	Left	18.65	318	1.13	15.4	0.95	9h	Deltoideus	Left	15.83	257	0.75	18.7	1.11	9h	Bic Fem c l	Left	17.2	297	1.24	17.8	1.1	9h	Gastr c m	Left	15.46	241	1.1	22	1.35
12h	Tric Br c l	Left	13.17	189	0.83	24.4	1.42	12h	Rect Femoris	Left	17.23	311	1.39	17.9	1.14	12h	Add Pollicis	Left	17.72	297	1.29	16.3	1.01	12h	Deltoideus	Left	15.87	243	0.72	18.5	1.06	12h	Bic Fem c br	Left	16.66	272	1.2	19	1.17	12h	Gastr c m	Right	15.47	244	0.95	21.5	1.32
12h	Tric Br c l	Left	13.17	188	0.82	24.5	1.44	12h	Rect Femoris	Left	17.42	319	1.36	17.7	1.13	12h	Add Pollicis	Left	17.62	301	1.26	16.3	1.01	12h	Deltoideus	Left	15.77	241	0.71	18.6	1.08	12h	Bic Fem c br	Left	16.08	269	1.24	19.6	1.21	12h	Gastr c m	Right	15.85	251	1	21.1	1.28
12h	Tric Br c l	Left	13.26	195	0.83	24.4	1.45	12h	Rect Femoris	Left	17.42	324	1.37	17.7	1.13	12h	Add Pollicis	Left	17.72	302	1.27	16.3	1.01	12h	Deltoideus	Left	15.68	245	0.74	19.1	1.14	12h	Bic Fem c br	Left	16.47	272	1.22	19.1	1.18	12h	Gastr c m	Right	15.37	249	0.98	21.3	1.29
12h	Tric Br c l	Left	13.27	190	0.82	24.4	1.43	12h	Rect Femoris	Left	17.33	321	1.35	17.7	1.13	12h	Add Pollicis	Left	17.91	306	1.26	16	0.99	12h	Deltoideus	Left	15.48	240	0.73	19.3	1.12	12h	Bic Fem c br	Left	16.96	279	1.22	18.7	1.16	12h	Gastr c m	Right	15.76	251	0.99	21.1	1.28
12h	Tric Br c l	Left	13.36	191	0.82	24.1	1.4	12h	Rect Femoris	Left	17.42	319	1.34	17.7	1.13	12h	Add Pollicis	Left	18.01	308	1.23	16	1	12h	Deltoideus	Left	15.77	245	0.72	19	1.1	12h	Bic Fem c br	Left	16.67	277	1.25	19.1	1.18	12h	Gastr c m	Right	15.85	252	0.95	21	1.27
15h	Tric Br c l	Left	13.77	206	0.91	23.3	1.37	15h	Rect Femoris	Left	17.85	329	1.42	17	1.08	15h	Abd Poll Br	Left	18.43	308	1.19	15.7	0.97	15h	Deltoideus	Left	15.99	260	0.81	18.3	1.09	15h	Bic Fem c l	Left	17.07	329	1.19	16	1	15h	Gastr c m	Left	14.72	209	1.19	23.2	1.38
15h	Tric Br c l	Left	13.77	203	0.89	23.1	1.35	15h	Rect Femoris	Left	17.83	338	1.39	16.9	1.08	15h	Abd Poll Br	Left	18.42	306	1.18	15.8	0.97	15h	Deltoideus	Left	16	253	0.77	18.2	1.07	15h	Bic Fem c l	Left	17.07	333	1.2	16	1	15h	Gastr c m	Left	14.53	215	1.18	23.5	1.41
15h	Tric Br c l	Left	13.86	207	0.89	23.1	1.37	15h	Rect Femoris	Left	17.63	329	1.35	17	1.08	15h	Abd Poll Br	Left	18.52	305	1.15	15.7	0.96	15h	Deltoideus	Left	16.29	261	0.79	18.3	1.09	15h	Bic Fem c l	Left	17.06	331	1.17	16.2	1.02	15h	Gastr c m	Left	14.14	206	1.21	23.9	1.43
15h	Tric Br c l	Left	13.87	202	0.89	23.2	1.37	15h	Rect Femoris	Left	17.54	326	1.33	17.2	1.09	15h	Abd Poll Br	Left	18.52	307	1.15	15.8	0.97	15h	Deltoideus	Left	16.1	261	0.77	18.3	1.08	15h	Bic Fem c l	Left	16.97	330	1.17	16.2	1.01	15h	Gastr c m	Left	14.45	209	1.22	23.6	1.41
15h	Tric Br c l	Left	13.87	209	0.89	23	1.36	15h	Rect Femoris	Left	17.75	330	1.39	16.9	1.07	15h	Abd Poll Br	Left	18.42	308	1.13	15.7	0.96	15h	Deltoideus	Left	16.39	264	0.78	18.1	1.08	15h	Bic Fem c l	Left	17.06	331	1.16	16.1	1.01	15h	Gastr c m	Left	14.34	211	1.18	24	1.45
18h	Tric Br c l	Left	13.47	195	0.83	24.5	1.46	18h	Rect Femoris	Left	17.75	319	1.22	17.1	1.07	18h	Abd Poll Br	Left	19.2	347	1.22	14.5	0.91	18h	Deltoideus	Left	17.57	293	0.79	16.7	1.01	18h	Bic Fem c l	Left	16.78	284	1.2	18.6	1.14	18h	Gastr c m	Right	14.53	232	1.08	22.9	1.4
18h	Tric Br c l	Left	13.28	195	0.84	24.7	1.47	18h	Rect Femoris	Left	17.75	321	1.21	17.1	1.07	18h	Abd Poll Br	Left	19.2	337	1.25	14.6	0.91	18h	Deltoideus	Left	17.37	295	0.77	16.8	1.02	18h	Bic Fem c l	Left	16.59	284	1.19	18.7	1.16	18h	Gastr c m	Right	14.63	231	1.05	22.3	1.36
18h	Tric Br c l	Left	13.27	193	0.85	24.8	1.48	18h	Rect Femoris	Left	17.36	317	1.24	17.5	1.1	18h	Abd Poll Br	Left	19.19	335	1.22	14.7	0.91	18h	Deltoideus	Left	17.27	290	0.78	17	1.03	18h	Bic Fem c l	Left	16.4	281	1.21	19.3	1.19	18h	Gastr c m	Right	14.63	230	1.06	22.4	1.37
18h	Tric Br c l	Left	13.19	195	0.84	24.8	1.49	18h	Rect Femoris	Left	17.65	320	1.2	17.3	1.09	18h	Abd Poll Br	Left	19.38	334	1.23	14.7	0.91	18h	Deltoideus	Left	17.25	285	0.77	16.8	1	18h	Bic Fem c l	Left	16.59	282	1.21	19.2	1.19	18h	Gastr c m	Right	14.43	227	1.06	22.5	1.36
18h	Tric Br c l	Left	13.19	194	0.84	24.9	1.48	18h	Rect Femoris	Left	17.65	322	1.19	17.1	1.08	18h	Abd Poll Br	Left	19.21	335	1.22	14.7	0.91	18h	Deltoideus	Left	17.35	288	0.75	16.6	0.99	18h	Bic Fem c l	Left	16.88	287	1.19	18.4	1.14	18h	Gastr c m	Right	14.34	223	1.07	23.2	1.41
9h	Tric Br c l	Right	14.46	237	1.16	21.7	1.31	9h	Rect Femoris	Right	17.27	307	1.25	17.2	1.06	9h	Abd Poll Br	Right	18.84	326	1.21	15.1	0.93	9h	Deltoideus	Right	15.73	238	0.8	18.5	1.07	9h	Bic Fem c l	Right	18.55	369	1.27	14.1	0.88	9h	Gastr c m	Left	14.84	237	1.39	22.2	1.35
9h	Tric Br c l	Right	14.18	229	1.13	22	1.32	9h	Rect Femoris	Right	17.27	308	1.24	17.2	1.07	9h	Abd Poll Br	Right	18.55	320	1.19	15.2	0.93	9h	Deltoideus	Right	15.63	231	0.84	18.5	1.05	9h	Bic Fem c l	Right	18.75	372	1.23	13.8	0.86	9h	Gastr c m	Left	15.13	240	1.44	21.6	1.31
9h	Tric Br c l	Right	14.27	234	1.15	21.6	1.3	9h	Rect Femoris	Right	17.37	310	1.26	17.2	1.07	9h	Abd Poll Br	Right	18.75	320	1.18	15	0.92	9h	Deltoideus	Right	15.54	234	0.85	18.9	1.08	9h	Bic Fem c l	Right	18.46	367	1.22	14.2	0.89	9h	Gastr c m	Left	14.75	236	1.33	22.2	1.35
9h	Tric Br c l	Right	14.37	240	1.16	21.6	1.3	9h	Rect Femoris	Right	17.18	307	1.23	17.2	1.07	9h	Abd Poll Br	Right	18.46	316	1.18	15.3	0.94	9h	Deltoideus	Right	15.73	240	0.82	18.4	1.05	9h	Bic Fem c l	Right	18.65	374	1.23	13.9	0.87	9h	Gastr c m	Left	14.75	237	1.39	22.1	1.34
9h	Tric Br c l	Right	14.27	238	1.13	21.8	1.31	9h	Rect Femoris	Right	17.27	307	1.22	17.2	1.07	9h	Abd Poll Br	Right	18.36	317	1.19	15.3	0.93	9h	Deltoideus	Right	15.73	242	0.81	18.3	1.04	9h	Bic Fem c l	Right	18.26	366	1.21	14.3	0.89	9h	Gastr c m	Left	14.55	237	1.37	22.2	1.35
12h	Tric Br c l	Right	13.64	212	1.06	22.8	1.35	12h	Rect Femoris	Right	17.23	297	1.44	18.2	1.15	12h	Add Pollicis	Right	18.59	301	1.2	16	0.99	12h	Deltoideus	Right	15.67	242	0.75	19.1	1.11	12h	Bic Fem c br	Right	18.3	351	1.34	14.6	0.92	12h	Gastr c m	Right	15.72	252	1.27	21.5	1.32
12h	Tric Br c l	Right	13.55	212	1.02	22.9	1.37	12h	Rect Femoris	Right	16.74	293	1.4	18.4	1.16	12h	Add Pollicis	Right	18.2	300	1.18	16.1	0.99	12h	Deltoideus	Right	15.96	250	0.74	18.9	1.11	12h	Bic Fem c br	Right	18.01	346	1.3	14.7	0.92	12h	Gastr c m	Right	15.62	253	1.24	21.4	1.32
12h	Tric Br c l	Right	13.75	217	1.07	22.6	1.35	12h	Rect Femoris	Right	17.13	299	1.41	18.1	1.14	12h	Add Pollicis	Right	18.2	297	1.17	16.3	1.01	12h	Deltoideus	Right	15.77	248	0.72	18.9	1.11	12h	Bic Fem c br	Right	17.91	346	1.31	14.9	0.94	12h	Gastr c m	Right	15.6	252	1.27	21.5	1.32
12h	Tric Br c l	Right	13.75	220	1.03	22.7	1.37	12h	Rect Femoris	Right	17.23	298	1.4	18.1	1.12	12h	Add Pollicis	Right	18.59	310	1.14	16	1	12h	Deltoideus	Right	15.48	246	0.76	19.4	1.14	12h	Bic Fem c br	Right	18.11	351	1.29	14.6	0.92	12h	Gastr c m	Right	15.52	254	1.3	21.5	1.32
12h	Tric Br c l	Right	13.65	220	1.04	22.7	1.37	12h	Rect Femoris	Right	17.13	297	1.4	18.1	1.14	12h	Add Pollicis	Right	18.59	303	1.13	16	0.99	12h	Deltoideus	Right	15.58	242	0.73	19.4	1.13	12h	Bic Fem c br	Right	17.91	348	1.3	14.8	0.93	12h	Gastr c m	Right	15.81	251	1.23	21.5	1.32
15h	Tric Br c l	Right	14.34	210	0.89	22.4	1.32	15h	Rect Femoris	Right	16.86	296	1.47	18.5	1.16	15h	Abd Poll Br	Right	18.72	343	1.37	14.4	0.89	15h	Deltoideus	Right	15.52	236	0.82	19.2	1.12	15h	Bic Fem c l	Right	18.33	361	1.32	14.4	0.91	15h	Gastr c m	Left	14.95	230	1.18	22.8	1.39
15h	Tric Br c l	Right	14.34	208	0.86	22.3	1.31	15h	Rect Femoris	Right	16.67	293	1.4	18.6	1.16	15h	Abd Poll Br	Right	18.62	338	1.34	14.6	0.91	15h	Deltoideus	Right	15.52	238	0.79	18.8	1.09	15h	Bic Fem c l	Right	18.82	364	1.3	14.2	0.9	15h	Gastr c m	Left	15.53	236	1.17	22.4	1.35
15h	Tric Br c l	Right	14.56	216	0.9	21.6	1.26	15h	Rect Femoris	Right	16.78	296	1.46	18.5	1.16	15h	Abd Poll Br	Right	18.62	341	1.34	14.5	0.9	15h	Deltoideus	Right	15.41	230	0.78	19	1.09	15h	Bic Fem c l	Right	18.23	361	1.33	14.4	0.91	15h	Gastr c m	Left	15.34	235	1.16	22.3	1.35
15h	Tric Br c l	Right	14.55	220	0.91	21.8	1.29	15h	Rect Femoris	Right	16.78	298	1.45	18.4	1.15	15h	Abd Poll Br	Right	18.32	337	1.33	14.7	0.91	15h	Deltoideus	Right	15.8	247	0.77	18.5	1.08	15h	Bic Fem c l	Right	18.32	360	1.29	14.4	0.91	15h	Gastr c m	Left	15.44	236	1.14	22.1	1.34
15h	Tric Br c l	Right	14.45	215	0.89	21.9	1.29	15h	Rect Femoris	Right	16.58	298	1.44	18.5	1.16	15h	Abd Poll Br	Right	18.51	341	1.34	14.6	0.91	15h	Deltoideus	Right	15.6	241	0.79	18.9	1.11	15h	Bic Fem c l	Right	18.42	362	1.32	14.3	0.9	15h	Gastr c m	Left	15.53	236	1.17	22.1	1.33
18h	Tric Br c l	Right	13.58	205	1.01	22.9	1.33	18h	Rect Femoris	Right	16.68	289	1.25	18.2	1.13	18h	Abd Poll Br	Right	18.92	330	1.04	14.8	0.91	18h	Deltoideus	Right	16.19	252	0.77	18.5	1.1	18h	Bic Fem c l	Right	17.55	334	1.34	15.1	0.94	18h	Gastr c m	Right	15.03	236	1.05	22	1.33
18h	Tric Br c l	Right	13.48	205	0.99	23	1.34	18h	Rect Femoris	Right	16.48	286	1.27	18.3	1.13	18h	Abd Poll Br	Right	18.8	327	1.02	14.9	0.92	18h	Deltoideus	Right	16.4	253	0.74	17.7	1.03	18h	Bic Fem c l	Right	17.46	342	1.29	15.2	0.95	18h	Gastr c m	Right	15.14	240	1.02	21.4	1.3
18h	Tric Br c l	Right	13.48	206	0.98	22.8	1.32	18h	Rect Femoris	Right	16.77	291	1.26	18.1	1.12	18h	Abd Poll Br	Right	18.9	329	1.03	14.8	0.91	18h	Deltoideus	Right	16.29	258	0.77	18	1.06	18h	Bic Fem c l	Right	17.17	337	1.3	15.4	0.96	18h	Gastr c m	Right	14.95	237	1.05	21.8	1.32
18h	Tric Br c l	Right	13.58	205	0.96	22.8	1.32	18h	Rect Femoris	Right	16.77	291	1.25	18.2	1.13	18h	Abd Poll Br	Right	19	331	1.03	14.8	0.91	18h	Deltoideus	Right	16.19	254	0.76	18.3	1.08	18h	Bic Fem c l	Right	17.06	326	1.26	15.7	0.98	18h	Gastr c m	Right	14.75	236	1.05	22	1.33
18h	Tric Br c l	Right	13.58	202	0.97	22.6	1.3	18h	Rect Femoris	Right	16.77	300	1.24	18.2	1.14	18h	Abd Poll Br	Right	19	330	1.02	14.8	0.91	18h	Deltoideus	Right	16.19	256	0.73	18.4	1.1	18h	Bic Fem c l	Right	17.27	330	1.26	15.4	0.96	18h	Gastr c m	Right	15.04	238	1.01	21.8	1.32

## Sheet: Participant_13
Time	Object	Side	Frequency	Stiffness	Decrement	Relaxation	Creep	Time	Object	Side	Frequency	Stiffness	Decrement	Relaxation	Creep	Time	Object	Side	Frequency	Stiffness	Decrement	Relaxation	Creep	Time	Object	Side	Frequency	Stiffness	Decrement	Relaxation	Creep	Time	Object	Side	Frequency	Stiffness	Decrement	Relaxation	Creep	Time	Object	Side	Frequency	Stiffness	Decrement	Relaxation	Creep
9h	Tric Br c l	Left	14.49	232	1.33	21.9	1.34	9h	Rect Femoris	Left	14.78	257	1.32	20.5	1.25	9h	Gastr c m	Left	14.03	254	1.22	22.5	1.41	9h	Deltoideus	Left	15.85	257	0.85	18.6	1.11	9h	Bic Fem c l	Left	17.14	306	1.34	16.7	1.04	9h	Abd Poll Br	Left	24.92	506	1.72	10.3	0.67
9h	Tric Br c l	Left	14.39	230	1.29	22.1	1.35	9h	Rect Femoris	Left	14.87	264	1.34	20.5	1.26	9h	Gastr c m	Left	13.93	260	1.23	22.6	1.42	9h	Deltoideus	Left	15.85	257	0.85	18.6	1.1	9h	Bic Fem c l	Left	17.24	309	1.28	16.6	1.04	9h	Abd Poll Br	Left	24.82	518	1.69	10.1	0.66
9h	Tric Br c l	Left	14.3	228	1.27	22.3	1.36	9h	Rect Femoris	Left	14.96	259	1.36	20.6	1.26	9h	Gastr c m	Left	14.02	262	1.22	22.5	1.41	9h	Deltoideus	Left	15.65	258	0.84	18.7	1.12	9h	Bic Fem c l	Left	17.43	310	1.27	16.4	1.02	9h	Abd Poll Br	Left	24.9	518	1.66	10	0.65
9h	Tric Br c l	Left	14.39	232	1.28	22.3	1.37	9h	Rect Femoris	Left	14.97	267	1.41	20.4	1.26	9h	Gastr c m	Left	14.02	263	1.23	22.5	1.41	9h	Deltoideus	Left	15.46	247	0.84	18.8	1.11	9h	Bic Fem c l	Left	17.43	313	1.25	16.4	1.02	9h	Abd Poll Br	Left	24.91	520	1.65	10.1	0.66
9h	Tric Br c l	Left	14.3	227	1.28	22.2	1.36	9h	Rect Femoris	Left	14.97	263	1.38	20.7	1.27	9h	Gastr c m	Left	13.83	260	1.23	22.6	1.42	9h	Deltoideus	Left	15.55	246	0.81	18.7	1.09	9h	Bic Fem c l	Left	17.43	312	1.27	16.4	1.02	9h	Abd Poll Br	Left	24.92	521	1.62	10.1	0.66
12h	Tric Br c l	Left	14.34	241	1.23	21.5	1.32	12h	Rect Femoris	Left	15.12	269	1.56	20.6	1.29	12h	Gastr c m	Left	14.74	267	1.43	22.1	1.39	12h	Deltoideus	Left	15.41	247	0.91	19.5	1.17	12h	Bic Fem c l	Left	17.74	316	1.38	16.4	1.02	12h	Abd Poll Br	Left	24.32	565	1.77	9.2	0.61
12h	Tric Br c l	Left	14.24	238	1.2	21.8	1.33	12h	Rect Femoris	Left	14.92	267	1.55	20.6	1.29	12h	Gastr c m	Left	14.74	266	1.4	21.9	1.38	12h	Deltoideus	Left	15.41	251	0.89	19.4	1.18	12h	Bic Fem c l	Left	17.84	330	1.34	16.1	1.01	12h	Abd Poll Br	Left	24.51	575	1.74	9.2	0.61
12h	Tric Br c l	Left	14.15	235	1.17	22.1	1.35	12h	Rect Femoris	Left	15.21	271	1.52	20.5	1.29	12h	Gastr c m	Left	14.83	270	1.41	21.9	1.38	12h	Deltoideus	Left	15.49	251	0.92	19.3	1.16	12h	Bic Fem c l	Left	17.84	329	1.31	16.2	1.01	12h	Abd Poll Br	Left	24.92	583	1.69	8.9	0.59
12h	Tric Br c l	Left	14.24	238	1.17	21.9	1.34	12h	Rect Femoris	Left	15.21	271	1.52	20.5	1.29	12h	Gastr c m	Left	14.45	269	1.42	22	1.38	12h	Deltoideus	Left	15.41	251	0.93	19.2	1.16	12h	Bic Fem c l	Left	17.74	330	1.33	16.3	1.02	12h	Abd Poll Br	Left	24.71	584	1.7	8.9	0.59
12h	Tric Br c l	Left	14.05	230	1.15	22	1.34	12h	Rect Femoris	Left	15.31	271	1.54	20.3	1.27	12h	Gastr c m	Left	15.32	274	1.48	21.8	1.37	12h	Deltoideus	Left	15.6	256	0.94	19.1	1.16	12h	Bic Fem c l	Left	17.55	327	1.37	16.4	1.03	12h	Abd Poll Br	Left	25.1	589	1.68	8.9	0.59
15h	Tric Br c l	Left	14.07	225	1.34	22.7	1.37	15h	Rect Femoris	Left	14.95	264	1.37	20.3	1.26	15h	Gastr c m	Left	15.65	276	1.65	21.3	1.33	15h	Deltoideus	Left	16.2	261	0.85	18.1	1.08	15h	Bic Fem c l	Left	16.71	292	1.34	17.6	1.08	15h	Abd Poll Br	Left	25.34	573	1.74	8.9	0.58
15h	Tric Br c l	Left	14.17	223	1.33	22.3	1.33	15h	Rect Femoris	Left	14.75	263	1.37	20.4	1.27	15h	Gastr c m	Left	15.45	276	1.62	21.2	1.32	15h	Deltoideus	Left	16.3	263	0.81	18	1.07	15h	Bic Fem c l	Left	17	303	1.29	17.3	1.06	15h	Abd Poll Br	Left	25.05	581	1.67	9	0.59
15h	Tric Br c l	Left	13.97	221	1.3	22.6	1.36	15h	Rect Femoris	Left	14.75	264	1.31	20.4	1.27	15h	Gastr c m	Left	15.07	276	1.6	21.2	1.31	15h	Deltoideus	Left	16.2	262	0.82	18	1.07	15h	Bic Fem c l	Left	17.1	306	1.31	17.1	1.05	15h	Abd Poll Br	Left	25.15	594	1.67	8.7	0.58
15h	Tric Br c l	Left	13.88	226	1.32	22.9	1.38	15h	Rect Femoris	Left	14.85	264	1.28	20.4	1.27	15h	Gastr c m	Left	15.07	277	1.62	21.6	1.35	15h	Deltoideus	Left	16.2	264	0.82	18	1.07	15h	Bic Fem c l	Left	16.9	303	1.32	17.3	1.06	15h	Abd Poll Br	Left	25.44	593	1.66	8.7	0.57
15h	Tric Br c l	Left	13.88	220	1.32	22.8	1.36	15h	Rect Femoris	Left	14.84	266	1.31	20.3	1.26	15h	Gastr c m	Left	15.55	277	1.64	20.8	1.29	15h	Deltoideus	Left	16.4	267	0.84	17.8	1.06	15h	Bic Fem c l	Left	16.71	303	1.36	17.5	1.08	15h	Abd Poll Br	Left	25.54	589	1.66	8.9	0.59
18h	Tric Br c l	Left	14.62	246	1.39	20.8	1.27	18h	Rect Femoris	Left	14.81	262	1.29	20.1	1.25	18h	Gastr c m	Left	15.51	259	1.43	22.3	1.39	18h	Deltoideus	Left	15.98	265	0.9	18.4	1.12	18h	Bic Fem c l	Left	16.36	293	1.28	17.4	1.08	18h	Abd Poll Br	Left	24.4	496	1.62	10.5	0.68
18h	Tric Br c l	Left	14.23	239	1.34	21.1	1.28	18h	Rect Femoris	Left	14.91	269	1.31	20.1	1.25	18h	Gastr c m	Left	15.42	259	1.36	22	1.38	18h	Deltoideus	Left	15.78	259	0.88	18.7	1.13	18h	Bic Fem c l	Left	16.36	297	1.3	17.3	1.07	18h	Abd Poll Br	Left	24.3	500	1.57	10.4	0.67
18h	Tric Br c l	Left	14.33	242	1.32	21.2	1.3	18h	Rect Femoris	Left	14.91	266	1.29	20.1	1.25	18h	Gastr c m	Left	15.51	264	1.38	21.9	1.37	18h	Deltoideus	Left	15.78	265	0.9	18.9	1.16	18h	Bic Fem c l	Left	16.27	297	1.31	17.3	1.07	18h	Abd Poll Br	Left	24.21	497	1.64	10.5	0.68
18h	Tric Br c l	Left	14.43	244	1.35	21.2	1.3	18h	Rect Femoris	Left	15.3	276	1.23	19.3	1.21	18h	Gastr c m	Left	15.51	259	1.41	22.1	1.38	18h	Deltoideus	Left	15.98	264	0.91	18.4	1.11	18h	Bic Fem c l	Left	16.36	296	1.34	17.5	1.09	18h	Abd Poll Br	Left	24.4	495	1.65	10.7	0.7
18h	Tric Br c l	Left	14.33	243	1.31	21.4	1.31	18h	Rect Femoris	Left	15.3	276	1.23	19.2	1.2	18h	Gastr c m	Left	15.51	265	1.4	22	1.38	18h	Deltoideus	Left	15.89	268	0.88	18.6	1.14	18h	Bic Fem c l	Left	16.56	300	1.32	17.1	1.06	18h	Abd Poll Br	Left	24.5	495	1.6	10.7	0.7
9h	Tric Br c l	Right	14.88	263	1.44	19.7	1.19	9h	Rect Femoris	Right	14.97	253	1.28	21.3	1.3	9h	Gastr c m	Right	14.02	231	1.02	23.9	1.48	9h	Deltoideus	Right	14.78	240	0.93	20.5	1.22	9h	Bic Fem c l	Right	20.25	373	1.44	13.6	0.86	9h	Abd Poll Br	Right	23.73	452	1.45	11.4	0.74
9h	Tric Br c l	Right	15.16	262	1.48	19.1	1.15	9h	Rect Femoris	Right	14.77	261	1.3	21.6	1.33	9h	Gastr c m	Right	13.83	229	1.03	24.2	1.5	9h	Deltoideus	Right	14.97	240	0.89	20.3	1.2	9h	Bic Fem c l	Right	20.35	368	1.46	14	0.89	9h	Abd Poll Br	Right	23.93	457	1.41	11.4	0.74
9h	Tric Br c l	Right	15.08	268	1.43	19.2	1.16	9h	Rect Femoris	Right	14.67	258	1.27	21.6	1.33	9h	Gastr c m	Right	13.93	230	1	24	1.49	9h	Deltoideus	Right	14.87	244	0.9	20.4	1.21	9h	Bic Fem c l	Right	19.96	365	1.5	14.1	0.89	9h	Abd Poll Br	Right	23.93	460	1.41	11.4	0.74
9h	Tric Br c l	Right	14.88	260	1.43	19.4	1.17	9h	Rect Femoris	Right	14.77	253	1.27	21.5	1.32	9h	Gastr c m	Right	13.73	232	1.03	24	1.49	9h	Deltoideus	Right	14.77	238	0.88	20.2	1.18	9h	Bic Fem c l	Right	19.96	368	1.47	13.9	0.88	9h	Abd Poll Br	Right	23.93	463	1.38	11.4	0.74
9h	Tric Br c l	Right	14.98	267	1.41	19.4	1.17	9h	Rect Femoris	Right	14.77	253	1.27	21.6	1.32	9h	Gastr c m	Right	13.73	230	1.03	24.2	1.51	9h	Deltoideus	Right	14.78	238	0.9	20.3	1.2	9h	Bic Fem c l	Right	20.05	371	1.46	13.7	0.87	9h	Abd Poll Br	Right	23.73	456	1.38	11.4	0.74
12h	Tric Br c l	Right	14.54	268	1.38	19.6	1.2	12h	Rect Femoris	Right	15.02	260	1.15	20.4	1.27	12h	Gastr c m	Right	13.87	237	1.3	23.1	1.44	12h	Deltoideus	Right	15.8	258	0.96	19	1.15	12h	Bic Fem c l	Right	19.29	353	1.43	14.4	0.91	12h	Abd Poll Br	Right	26.16	539	1.53	9.8	0.64
12h	Tric Br c l	Right	14.92	275	1.38	19.2	1.19	12h	Rect Femoris	Right	14.82	257	1.14	20.7	1.29	12h	Gastr c m	Right	13.86	239	1.27	23.2	1.44	12h	Deltoideus	Right	15.8	261	0.92	19	1.15	12h	Bic Fem c l	Right	19.68	357	1.46	14.2	0.9	12h	Abd Poll Br	Right	25.97	541	1.48	9.9	0.65
12h	Tric Br c l	Right	15.01	274	1.38	19.3	1.19	12h	Rect Femoris	Right	14.82	259	1.17	20.6	1.28	12h	Gastr c m	Right	13.96	239	1.24	23.1	1.44	12h	Deltoideus	Right	15.7	252	0.95	19	1.14	12h	Bic Fem c l	Right	19.77	360	1.41	14	0.88	12h	Abd Poll Br	Right	26.06	538	1.47	9.9	0.65
12h	Tric Br c l	Right	15.11	277	1.39	19	1.17	12h	Rect Femoris	Right	15.02	259	1.17	20.6	1.28	12h	Gastr c m	Right	13.86	241	1.29	23.5	1.46	12h	Deltoideus	Right	15.79	260	0.96	19	1.15	12h	Bic Fem c l	Right	19.67	366	1.36	14	0.89	12h	Abd Poll Br	Right	25.87	544	1.46	9.9	0.65
12h	Tric Br c l	Right	15.12	277	1.37	19	1.17	12h	Rect Femoris	Right	14.92	263	1.17	20.4	1.27	12h	Gastr c m	Right	13.77	246	1.27	23.4	1.46	12h	Deltoideus	Right	15.89	263	0.98	19	1.15	12h	Bic Fem c l	Right	19.88	365	1.4	14	0.89	12h	Abd Poll Br	Right	25.58	536	1.43	10	0.66
15h	Tric Br c l	Right	15.32	282	1.42	18.4	1.13	15h	Rect Femoris	Right	14.55	248	1.46	22	1.35	15h	Gastr c m	Right	14.58	250	1.44	23	1.42	15h	Deltoideus	Right	16.11	260	0.84	18.3	1.09	15h	Bic Fem c l	Right	19.91	370	1.43	13.9	0.87	15h	Abd Poll Br	Right	25.44	532	1.55	9.7	0.63
15h	Tric Br c l	Right	15.53	285	1.38	18.3	1.12	15h	Rect Femoris	Right	14.46	249	1.44	22	1.35	15h	Gastr c m	Right	14.87	243	1.39	23.4	1.44	15h	Deltoideus	Right	15.81	255	0.85	18.5	1.09	15h	Bic Fem c l	Right	19.43	365	1.43	14.1	0.88	15h	Abd Poll Br	Right	25.52	536	1.52	9.7	0.63
15h	Tric Br c l	Right	15.53	283	1.37	18.1	1.11	15h	Rect Femoris	Right	14.46	250	1.45	22.1	1.36	15h	Gastr c m	Right	14.77	242	1.38	23.6	1.46	15h	Deltoideus	Right	16.01	261	0.82	18.4	1.1	15h	Bic Fem c l	Right	19.62	363	1.42	14.1	0.88	15h	Abd Poll Br	Right	25.61	548	1.48	9.6	0.62
15h	Tric Br c l	Right	15.53	284	1.33	18.3	1.12	15h	Rect Femoris	Right	14.46	253	1.5	21.8	1.35	15h	Gastr c m	Right	14.39	243	1.4	23.5	1.45	15h	Deltoideus	Right	15.82	256	0.83	18.5	1.1	15h	Bic Fem c l	Right	19.91	371	1.43	13.9	0.87	15h	Abd Poll Br	Right	25.64	543	1.52	9.6	0.62
15h	Tric Br c l	Right	15.43	280	1.35	18.2	1.11	15h	Rect Femoris	Right	14.46	251	1.5	22.1	1.36	15h	Gastr c m	Right	14.57	245	1.45	23.3	1.44	15h	Deltoideus	Right	15.92	259	0.83	18.5	1.1	15h	Bic Fem c l	Right	20.09	374	1.42	13.8	0.87	15h	Abd Poll Br	Right	25.52	544	1.48	9.3	0.6
18h	Tric Br c l	Right	15.2	268	1.41	18.5	1.13	18h	Rect Femoris	Right	14.91	259	1.2	20.4	1.27	18h	Gastr c m	Right	13.85	230	1.33	24.1	1.5	18h	Deltoideus	Right	15.49	252	0.91	19.6	1.18	18h	Bic Fem c l	Right	19.08	344	1.36	14.6	0.92	18h	Abd Poll Br	Right	23.63	440	1.4	11.6	0.74
18h	Tric Br c l	Right	15.2	270	1.42	18.4	1.12	18h	Rect Femoris	Right	15.01	262	1.2	20.2	1.26	18h	Gastr c m	Right	14.24	240	1.34	23.8	1.49	18h	Deltoideus	Right	15.4	251	0.92	19.7	1.19	18h	Bic Fem c l	Right	18.98	346	1.33	14.7	0.93	18h	Abd Poll Br	Right	23.53	443	1.37	11.7	0.75
18h	Tric Br c l	Right	15.2	278	1.4	18.5	1.13	18h	Rect Femoris	Right	14.81	258	1.18	20.4	1.26	18h	Gastr c m	Right	14.24	233	1.36	23.8	1.48	18h	Deltoideus	Right	15.3	248	0.91	19.8	1.19	18h	Bic Fem c l	Right	19.27	347	1.31	14.6	0.92	18h	Abd Poll Br	Right	23.43	445	1.36	11.7	0.75
18h	Tric Br c l	Right	15.2	278	1.38	18.5	1.13	18h	Rect Femoris	Right	14.91	265	1.16	20.5	1.28	18h	Gastr c m	Right	14.53	240	1.33	23.6	1.48	18h	Deltoideus	Right	15.3	240	0.92	19.3	1.13	18h	Bic Fem c l	Right	19.27	349	1.28	14.4	0.91	18h	Abd Poll Br	Right	23.43	443	1.33	11.7	0.75
18h	Tric Br c l	Right	15.2	278	1.37	18.5	1.13	18h	Rect Femoris	Right	14.91	263	1.18	20.2	1.26	18h	Gastr c m	Right	14.53	241	1.32	23.6	1.48	18h	Deltoideus	Right	15.3	252	0.88	19.6	1.18	18h	Bic Fem c l	Right	19.47	349	1.32	14.3	0.9	18h	Abd Poll Br	Right	23.43	442	1.35	11.7	0.75

## Sheet: Participant_14
Time	Object	Side	Frequency	Stiffness	Decrement	Relaxation	Creep	Time	Object	Side	Frequency	Stiffness	Decrement	Relaxation	Creep	Time	Object	Side	Frequency	Stiffness	Decrement	Relaxation	Creep	Time	Object	Side	Frequency	Stiffness	Decrement	Relaxation	Creep	Time	Object	Side	Frequency	Stiffness	Decrement	Relaxation	Creep	Time	Object	Side	Frequency	Stiffness	Decrement	Relaxation	Creep
9h	Tric Br c l	Left	14.14	234	1.18	19.8	1.14	9h	Rect Femoris	Left	16.57	301	1.27	17.7	1.11	9h	Gastr c m	Left	16.14	244	1.31	21.7	1.33	9h	Deltoideus	Left	16.76	277	0.86	18	1.09	9h	Bic Fem c l	Left	19.05	351	1.52	15.4	0.96	9h	Abd Poll Br	Left	21.28	443	1.37	11.7	0.74
9h	Tric Br c l	Left	14.05	231	1.13	19.8	1.14	9h	Rect Femoris	Left	16.57	313	1.25	17.4	1.09	9h	Gastr c m	Left	16.13	240	1.29	21.9	1.34	9h	Deltoideus	Left	16.66	277	0.83	18.1	1.11	9h	Bic Fem c l	Left	19.05	353	1.54	15.4	0.96	9h	Abd Poll Br	Left	21.58	450	1.36	11.6	0.74
9h	Tric Br c l	Left	14.24	239	1.12	19.8	1.16	9h	Rect Femoris	Left	16.67	307	1.25	17.2	1.07	9h	Gastr c m	Left	16.23	249	1.29	21.9	1.36	9h	Deltoideus	Left	16.67	277	0.84	18	1.1	9h	Bic Fem c l	Left	18.96	348	1.54	15.4	0.96	9h	Abd Poll Br	Left	21.18	451	1.35	11.7	0.74
9h	Tric Br c l	Left	14.15	234	1.12	19.8	1.15	9h	Rect Femoris	Left	16.57	303	1.22	17.4	1.09	9h	Gastr c m	Left	16.23	240	1.29	22	1.35	9h	Deltoideus	Left	16.66	278	0.82	18	1.09	9h	Bic Fem c l	Left	18.66	344	1.59	15.7	0.98	9h	Abd Poll Br	Left	21.29	451	1.33	11.7	0.74
9h	Tric Br c l	Left	14.15	234	1.11	19.6	1.13	9h	Rect Femoris	Left	16.47	305	1.21	17.4	1.09	9h	Gastr c m	Left	16.13	243	1.29	22.3	1.38	9h	Deltoideus	Left	16.58	280	0.85	18.1	1.11	9h	Bic Fem c l	Left	18.96	349	1.5	15.4	0.96	9h	Abd Poll Br	Left	21.39	446	1.32	11.6	0.73
9h	Tric Br c l	Right	16.29	309	1.45	16.3	0.99	9h	Rect Femoris	Right	17.05	324	1.11	15.7	0.97	9h	Gastr c m	Right	14.47	244	1.22	22.3	1.39	9h	Deltoideus	Right	16.18	264	0.78	19	1.15	9h	Bic Fem c l	Right	20.12	349	1.41	14.8	0.92	9h	Abd Poll Br	Right	21.58	443	1.54	11.8	0.75
9h	Tric Br c l	Right	16.29	316	1.46	16.2	0.98	9h	Rect Femoris	Right	16.66	319	1.1	15.9	0.98	9h	Gastr c m	Right	14.37	239	1.17	22.6	1.4	9h	Deltoideus	Right	16.18	261	0.78	18.8	1.13	9h	Bic Fem c l	Right	20.03	350	1.44	14.8	0.92	9h	Abd Poll Br	Right	21	447	1.49	11.7	0.74
9h	Tric Br c l	Right	16.48	318	1.46	16.1	0.98	9h	Rect Femoris	Right	16.66	320	1.08	16	0.99	9h	Gastr c m	Right	14.17	241	1.2	22.5	1.4	9h	Deltoideus	Right	16.28	261	0.79	18.8	1.13	9h	Bic Fem c l	Right	20.81	366	1.45	14.1	0.88	9h	Abd Poll Br	Right	20.89	443	1.48	12	0.76
9h	Tric Br c l	Right	16.48	321	1.46	15.9	0.97	9h	Rect Femoris	Right	16.66	312	1.14	16.1	0.99	9h	Gastr c m	Right	14.17	238	1.17	22.7	1.4	9h	Deltoideus	Right	16.18	260	0.8	19	1.14	9h	Bic Fem c l	Right	20.71	368	1.45	14.2	0.89	9h	Abd Poll Br	Right	21.18	445	1.45	11.8	0.75
9h	Tric Br c l	Right	16.78	323	1.5	15.8	0.97	9h	Rect Femoris	Right	16.66	315	1.11	16	0.98	9h	Gastr c m	Right	14.47	239	1.18	22.5	1.4	9h	Deltoideus	Right	16.08	269	0.79	18.9	1.14	9h	Bic Fem c l	Right	20.22	355	1.43	14.6	0.91	9h	Abd Poll Br	Right	20.89	449	1.47	11.8	0.75
12h	Tric Br c l	Left	14.24	250	1.19	19.1	1.14	12h	Rect Femoris	Left	16.77	306	1.04	17	1.06	12h	Gastr c m	Left	13.49	243	1.29	22.3	1.37	12h	Deltoideus	Left	15.7	252	0.93	19.7	1.2	12h	Bic Fem c br	Left	18.91	343	1.44	15.3	0.96	12h	Add Pollicis	Left	21.72	353	1.36	14.1	0.88
12h	Tric Br c l	Left	14.24	250	1.18	19	1.13	12h	Rect Femoris	Left	16.67	304	1.02	17.1	1.07	12h	Gastr c m	Left	13.19	244	1.3	22.5	1.39	12h	Deltoideus	Left	15.6	254	0.93	19.6	1.19	12h	Bic Fem c br	Left	18.81	341	1.43	15.5	0.98	12h	Add Pollicis	Left	21.7	354	1.36	13.8	0.86
12h	Tric Br c l	Left	14.53	261	1.18	18.4	1.1	12h	Rect Femoris	Left	16.56	304	1.01	17.1	1.07	12h	Gastr c m	Left	12.9	241	1.31	23	1.42	12h	Deltoideus	Left	15.5	253	0.95	19.8	1.21	12h	Bic Fem c br	Left	18.71	342	1.42	15.5	0.98	12h	Add Pollicis	Left	21.9	348	1.35	14	0.87
12h	Tric Br c l	Left	14.34	248	1.13	18.7	1.1	12h	Rect Femoris	Left	16.67	308	1.03	17	1.06	12h	Gastr c m	Left	12.9	227	1.25	23.5	1.44	12h	Deltoideus	Left	15.5	257	0.93	19.9	1.22	12h	Bic Fem c br	Left	18.62	341	1.44	15.5	0.97	12h	Add Pollicis	Left	21.8	350	1.38	14.2	0.89
12h	Tric Br c l	Left	14.64	260	1.19	18.5	1.11	12h	Rect Femoris	Left	16.66	304	1.04	17.1	1.07	12h	Gastr c m	Left	12.9	238	1.27	23	1.41	12h	Deltoideus	Left	15.41	257	0.92	19.9	1.22	12h	Bic Fem c br	Left	18.62	341	1.5	15.6	0.98	12h	Add Pollicis	Left	21.23	344	1.36	14.1	0.88
12h	Tric Br c l	Right	15.79	293	1.32	17.4	1.07	12h	Rect Femoris	Right	16.76	309	1.05	16.1	0.99	12h	Gastr c m	Right	16.19	248	1.11	21.1	1.3	12h	Deltoideus	Right	15.7	248	0.85	19.6	1.17	12h	Bic Fem c br	Right	20.75	357	1.34	14.1	0.88	12h	Add Pollicis	Right	19.18	335	1.42	14.7	0.92
12h	Tric Br c l	Right	15.7	289	1.31	17.6	1.07	12h	Rect Femoris	Right	16.76	309	1.09	16.1	0.99	12h	Gastr c m	Right	16.19	249	1.14	21	1.29	12h	Deltoideus	Right	15.6	249	0.82	19.6	1.17	12h	Bic Fem c br	Right	20.17	349	1.36	14.7	0.92	12h	Add Pollicis	Right	18.69	337	1.36	14.8	0.92
12h	Tric Br c l	Right	15.59	286	1.31	17.5	1.06	12h	Rect Femoris	Right	16.86	311	1.07	16	0.98	12h	Gastr c m	Right	16.09	248	1.14	21.1	1.3	12h	Deltoideus	Right	15.5	251	0.84	19.8	1.19	12h	Bic Fem c br	Right	20.55	353	1.33	14.4	0.9	12h	Add Pollicis	Right	18.52	328	1.34	14.8	0.92
12h	Tric Br c l	Right	15.5	286	1.27	17.6	1.07	12h	Rect Femoris	Right	16.76	309	1.08	16.1	0.99	12h	Gastr c m	Right	15.81	243	1.13	21.8	1.35	12h	Deltoideus	Right	15.6	246	0.84	19.7	1.17	12h	Bic Fem c br	Right	20.65	360	1.29	14	0.88	12h	Add Pollicis	Right	18.31	329	1.34	14.8	0.92
12h	Tric Br c l	Right	15.5	288	1.28	17.5	1.06	12h	Rect Femoris	Right	16.76	308	1.06	16.2	1	12h	Gastr c m	Right	16.1	247	1.13	21.3	1.31	12h	Deltoideus	Right	15.79	256	0.86	19.6	1.18	12h	Bic Fem c br	Right	20.65	362	1.28	13.9	0.87	12h	Add Pollicis	Right	18.4	333	1.33	15	0.94
15h	Tric Br c l	Left	14.74	267	1.29	18.5	1.11	15h	Rect Femoris	Left	16.96	311	1.25	17.1	1.07	15h	Gastr c m	Left	15.8	248	1.57	22.1	1.36	15h	Deltoideus	Left	16.67	277	0.91	18.3	1.13	15h	Bic Fem c l	Left	19	346	1.58	15.2	0.96	15h	Abd Poll Br	Left	23.47	472	1.48	11.1	0.71
15h	Tric Br c l	Left	14.45	259	1.25	18.7	1.11	15h	Rect Femoris	Left	16.97	314	1.2	16.9	1.06	15h	Gastr c m	Left	15.8	246	1.51	22.1	1.36	15h	Deltoideus	Left	16.68	282	0.89	18.1	1.12	15h	Bic Fem c l	Left	18.91	347	1.54	15.2	0.96	15h	Abd Poll Br	Left	23.17	478	1.44	11.1	0.71
15h	Tric Br c l	Left	14.35	259	1.25	18.9	1.12	15h	Rect Femoris	Left	16.87	313	1.19	17	1.07	15h	Gastr c m	Left	15.8	247	1.49	22.1	1.36	15h	Deltoideus	Left	16.58	282	0.87	18.1	1.12	15h	Bic Fem c l	Left	18.91	344	1.51	15.2	0.96	15h	Abd Poll Br	Left	23.17	475	1.42	11.2	0.72
15h	Tric Br c l	Left	14.25	255	1.23	18.9	1.12	15h	Rect Femoris	Left	16.68	309	1.2	17.3	1.09	15h	Gastr c m	Left	15.7	248	1.53	22.1	1.36	15h	Deltoideus	Left	16.58	282	0.86	18	1.11	15h	Bic Fem c l	Left	19.1	347	1.52	15.1	0.95	15h	Abd Poll Br	Left	23.27	480	1.39	11.2	0.72
15h	Tric Br c l	Left	14.34	256	1.22	18.8	1.11	15h	Rect Femoris	Left	16.77	309	1.16	17.3	1.09	15h	Gastr c m	Left	15.6	246	1.54	22.2	1.37	15h	Deltoideus	Left	16.58	281	0.87	18.1	1.11	15h	Bic Fem c l	Left	19.1	349	1.52	15.1	0.95	15h	Abd Poll Br	Left	23.17	479	1.38	11.2	0.72
15h	Tric Br c l	Right	16	303	1.34	16.8	1.03	15h	Rect Femoris	Right	17.34	327	1.13	15.4	0.96	15h	Gastr c m	Right	15.7	247	1.35	22.6	1.4	15h	Deltoideus	Right	15.71	257	0.84	19.3	1.17	15h	Bic Fem c l	Right	21.04	371	1.35	13.6	0.86	15h	Abd Poll Br	Right	23.27	470	1.66	10.9	0.7
15h	Tric Br c l	Right	15.8	302	1.31	17	1.05	15h	Rect Femoris	Right	17.15	324	1.12	15.5	0.96	15h	Gastr c m	Right	15.52	244	1.39	22.9	1.42	15h	Deltoideus	Right	15.61	257	0.82	19.4	1.17	15h	Bic Fem c l	Right	21.04	372	1.35	13.6	0.86	15h	Abd Poll Br	Right	23.08	480	1.61	11.1	0.72
15h	Tric Br c l	Right	15.71	302	1.3	17	1.04	15h	Rect Femoris	Right	17.15	324	1.14	15.5	0.96	15h	Gastr c m	Right	15.52	241	1.37	23.1	1.43	15h	Deltoideus	Right	15.6	256	0.8	19.3	1.16	15h	Bic Fem c l	Right	20.95	368	1.34	13.7	0.86	15h	Abd Poll Br	Right	23.66	491	1.63	10.7	0.69
15h	Tric Br c l	Right	15.7	299	1.28	17.2	1.06	15h	Rect Femoris	Right	17.15	326	1.12	15.3	0.95	15h	Gastr c m	Right	15.31	241	1.37	23.3	1.44	15h	Deltoideus	Right	15.7	257	0.81	19.4	1.17	15h	Bic Fem c l	Right	20.85	370	1.32	13.7	0.86	15h	Abd Poll Br	Right	23.27	494	1.61	10.7	0.69
15h	Tric Br c l	Right	15.71	299	1.28	17.2	1.05	15h	Rect Femoris	Right	17.15	328	1.14	15.4	0.95	15h	Gastr c m	Right	15.41	240	1.36	23.3	1.44	15h	Deltoideus	Right	15.7	256	0.82	19.3	1.17	15h	Bic Fem c l	Right	20.55	365	1.32	14	0.88	15h	Abd Poll Br	Right	23.66	500	1.58	10.7	0.7
18h	Tric Br c l	Left	14.82	266	1.22	18.1	1.08	18h	Rect Femoris	Left	16.47	304	1.07	17.4	1.09	18h	Gastr c m	Left	15.22	238	1.46	23.1	1.43	18h	Deltoideus	Left	16.08	256	0.85	19	1.15	18h	Bic Fem c l	Left	17.93	325	1.45	16.2	1.02	18h	Abd Poll Br	Left	22.27	410	1.41	12.3	0.78
18h	Tric Br c l	Left	15.01	280	1.21	17.6	1.06	18h	Rect Femoris	Left	16.47	304	1.07	17.6	1.1	18h	Gastr c m	Left	15.11	238	1.46	23.2	1.44	18h	Deltoideus	Left	16.08	258	0.84	19	1.15	18h	Bic Fem c l	Left	18.02	331	1.45	15.9	1	18h	Abd Poll Br	Left	21.5	409	1.37	12.5	0.8
18h	Tric Br c l	Left	14.92	279	1.19	17.7	1.07	18h	Rect Femoris	Left	16.47	305	1.06	17.6	1.11	18h	Gastr c m	Left	15.11	233	1.45	23.5	1.45	18h	Deltoideus	Left	15.98	256	0.8	19	1.15	18h	Bic Fem c l	Left	18.02	332	1.46	15.9	1	18h	Abd Poll Br	Left	21.98	397	1.35	12.5	0.79
18h	Tric Br c l	Left	14.81	272	1.14	18	1.08	18h	Rect Femoris	Left	16.47	307	1.08	17.5	1.1	18h	Gastr c m	Left	15.02	235	1.42	23.4	1.45	18h	Deltoideus	Left	15.99	258	0.8	18.8	1.14	18h	Bic Fem c l	Left	17.93	333	1.51	16	1.01	18h	Abd Poll Br	Left	22.08	411	1.34	12.6	0.8
18h	Tric Br c l	Left	15.01	283	1.21	17.5	1.06	18h	Rect Femoris	Left	16.47	305	1.08	17.6	1.1	18h	Gastr c m	Left	15.12	237	1.42	23.5	1.45	18h	Deltoideus	Left	15.98	258	0.8	19	1.15	18h	Bic Fem c l	Left	17.83	334	1.48	15.9	1	18h	Abd Poll Br	Left	21.78	399	1.36	12.5	0.79
18h	Tric Br c l	Right	16.66	319	1.45	15.7	0.96	18h	Rect Femoris	Right	17.24	321	1.07	15.6	0.97	18h	Gastr c m	Right	15.5	244	1.33	22.6	1.4	18h	Deltoideus	Right	15.8	256	0.77	19.1	1.15	18h	Bic Fem c l	Right	19.86	347	1.28	14.5	0.91	18h	Abd Poll Br	Right	22.27	428	1.46	11.8	0.75
18h	Tric Br c l	Right	16.56	320	1.43	15.7	0.96	18h	Rect Femoris	Right	17.14	319	1.05	15.7	0.97	18h	Gastr c m	Right	15.42	244	1.33	22.8	1.42	18h	Deltoideus	Right	15.79	257	0.78	19	1.14	18h	Bic Fem c l	Right	19.77	349	1.25	14.5	0.91	18h	Abd Poll Br	Right	22.17	428	1.45	12	0.77
18h	Tric Br c l	Right	16.55	322	1.41	15.6	0.96	18h	Rect Femoris	Right	17.14	319	1.05	15.6	0.97	18h	Gastr c m	Right	15.5	243	1.31	22.8	1.41	18h	Deltoideus	Right	15.79	258	0.77	19	1.15	18h	Bic Fem c l	Right	19.77	350	1.24	14.5	0.91	18h	Abd Poll Br	Right	22.47	428	1.43	12	0.77
18h	Tric Br c l	Right	16.66	324	1.4	15.6	0.96	18h	Rect Femoris	Right	17.05	321	1.06	15.5	0.96	18h	Gastr c m	Right	15.41	245	1.28	22.6	1.4	18h	Deltoideus	Right	15.8	260	0.76	19	1.15	18h	Bic Fem c l	Right	19.86	350	1.23	14.3	0.89	18h	Abd Poll Br	Right	21.98	429	1.41	11.9	0.76
18h	Tric Br c l	Right	16.46	323	1.37	15.6	0.96	18h	Rect Femoris	Right	17.14	321	1.02	15.6	0.96	18h	Gastr c m	Right	15.5	243	1.31	22.7	1.41	18h	Deltoideus	Right	15.69	258	0.76	19	1.15	18h	Bic Fem c l	Right	19.77	349	1.25	14.5	0.91	18h	Abd Poll Br	Right	21.88	431	1.41	12	0.77

## Sheet: Participant_15
Time	Object	Side	Frequency	Stiffness	Decrement	Relaxation	Creep	Time	Object	Side	Frequency	Stiffness	Decrement	Relaxation	Creep	Time	Object	Side	Frequency	Stiffness	Decrement	Relaxation	Creep	Time	Object	Side	Frequency	Stiffness	Decrement	Relaxation	Creep	Time	Object	Side	Frequency	Stiffness	Decrement	Relaxation	Creep	Time	Object	Side	Frequency	Stiffness	Decrement	Relaxation	Creep
9h	Tric Br c l	Left	16.68	303	1.35	16.4	1	9h	Rect Femoris	Left	16.09	287	1.5	19	1.19	9h	Gastr c m	Left	17.85	277	1.05	19.1	1.18	9h	Deltoideus	Left	13.57	198	0.7	22	1.25	9h	Bic Fem c l	Left	17.08	300	1.27	17.6	1.09	9h	Abd Poll Br	Left	18.53	351	1.28	14.1	0.88
9h	Tric Br c l	Left	16.77	308	1.33	16.2	0.99	9h	Rect Femoris	Left	16.09	293	1.55	19	1.19	9h	Gastr c m	Left	17.83	278	1.06	19	1.17	9h	Deltoideus	Left	13.67	197	0.69	21.6	1.22	9h	Bic Fem c l	Left	17.16	309	1.23	17.3	1.08	9h	Abd Poll Br	Left	18.32	352	1.25	14.1	0.87
9h	Tric Br c l	Left	16.68	301	1.3	16.3	1	9h	Rect Femoris	Left	16.09	298	1.57	18.5	1.17	9h	Gastr c m	Left	17.83	276	1.06	19.2	1.19	9h	Deltoideus	Left	13.67	198	0.68	21.5	1.21	9h	Bic Fem c l	Left	17.27	312	1.23	17.3	1.08	9h	Abd Poll Br	Left	18.62	354	1.26	14.1	0.88
9h	Tric Br c l	Left	16.68	303	1.28	16.4	1	9h	Rect Femoris	Left	16.19	295	1.55	18.6	1.17	9h	Gastr c m	Left	17.74	273	1.05	19.3	1.19	9h	Deltoideus	Left	13.57	200	0.67	21.8	1.24	9h	Bic Fem c l	Left	17.35	311	1.21	17.2	1.07	9h	Abd Poll Br	Left	18.63	356	1.25	14.1	0.88
9h	Tric Br c l	Left	16.59	307	1.29	16.4	1.01	9h	Rect Femoris	Left	16.19	297	1.55	18.6	1.17	9h	Gastr c m	Left	17.54	273	1.07	19.4	1.2	9h	Deltoideus	Left	13.57	196	0.66	21.8	1.24	9h	Bic Fem c l	Left	17.26	314	1.25	17.4	1.09	9h	Abd Poll Br	Left	18.63	357	1.25	14.1	0.88
9h	Tric Br c l	Right	14.26	228	1.1	20.5	1.21	9h	Rect Femoris	Right	15.51	274	1.18	18.7	1.16	9h	Gastr c m	Right	16.57	241	1.14	22.4	1.38	9h	Deltoideus	Right	15.8	255	0.8	18.1	1.08	9h	Bic Fem c l	Right	17.45	314	1.17	17.2	1.08	9h	Abd Poll Br	Right	20.18	347	1.44	14.4	0.9
9h	Tric Br c l	Right	14.26	229	1.1	20.6	1.22	9h	Rect Femoris	Right	15.41	277	1.19	18.6	1.14	9h	Gastr c m	Right	16.67	243	1.11	22.3	1.37	9h	Deltoideus	Right	15.7	256	0.78	18	1.07	9h	Bic Fem c l	Right	17.74	321	1.19	16.9	1.07	9h	Abd Poll Br	Right	20.37	345	1.45	14.2	0.88
9h	Tric Br c l	Right	14.45	231	1.11	20.4	1.2	9h	Rect Femoris	Right	15.4	277	1.19	18.7	1.16	9h	Gastr c m	Right	16.57	244	1.09	22.3	1.38	9h	Deltoideus	Right	15.6	254	0.78	18	1.07	9h	Bic Fem c l	Right	17.75	321	1.2	16.9	1.07	9h	Abd Poll Br	Right	20.07	345	1.42	14.3	0.89
9h	Tric Br c l	Right	14.45	232	1.09	20.4	1.22	9h	Rect Femoris	Right	15.21	277	1.21	18.7	1.15	9h	Gastr c m	Right	16.67	243	1.11	22.3	1.38	9h	Deltoideus	Right	15.7	255	0.79	17.9	1.06	9h	Bic Fem c l	Right	17.46	317	1.18	17.1	1.08	9h	Abd Poll Br	Right	20.37	343	1.41	14.3	0.89
9h	Tric Br c l	Right	14.45	236	1.08	20.7	1.25	9h	Rect Femoris	Right	15.3	276	1.2	18.7	1.15	9h	Gastr c m	Right	16.67	245	1.11	22.1	1.37	9h	Deltoideus	Right	15.6	256	0.78	18	1.07	9h	Bic Fem c l	Right	17.45	315	1.17	17.1	1.08	9h	Abd Poll Br	Right	20.46	354	1.44	14.1	0.88
12h	Tric Br c l	Left	15.91	277	1.15	17.5	1.05	12h	Rect Femoris	Left	16.78	295	1.58	18.7	1.17	12h	Gastr c m	Left	16.03	263	0.98	19.6	1.19	12h	Deltoideus	Left	13.87	205	0.77	21.9	1.26	12h	Bic Fem c br	Left	17.19	307	1.25	17.2	1.07	12h	Add Pollicis	Left	18.15	298	1.3	15.4	0.93
12h	Tric Br c l	Left	15.92	282	1.12	17.4	1.05	12h	Rect Femoris	Left	16.87	298	1.56	18.6	1.16	12h	Gastr c m	Left	15.64	262	0.96	19.8	1.2	12h	Deltoideus	Left	14.06	210	0.77	21.3	1.21	12h	Bic Fem c br	Left	17.18	308	1.19	17.2	1.07	12h	Add Pollicis	Left	17.95	295	1.23	15.4	0.92
12h	Tric Br c l	Left	16.01	284	1.12	17.4	1.05	12h	Rect Femoris	Left	16.88	300	1.6	18.5	1.16	12h	Gastr c m	Left	15.64	261	0.97	19.9	1.21	12h	Deltoideus	Left	14.06	208	0.78	21.1	1.19	12h	Bic Fem c br	Left	17.1	310	1.2	17.2	1.07	12h	Add Pollicis	Left	18.25	307	1.28	15.2	0.92
12h	Tric Br c l	Left	15.72	278	1.11	17.7	1.07	12h	Rect Femoris	Left	16.69	295	1.54	18.6	1.17	12h	Gastr c m	Left	15.93	264	0.96	19.7	1.21	12h	Deltoideus	Left	14.16	212	0.78	21.3	1.22	12h	Bic Fem c br	Left	17.18	309	1.22	17.2	1.07	12h	Add Pollicis	Left	17.96	302	1.23	15.4	0.93
12h	Tric Br c l	Left	15.81	279	1.08	17.6	1.06	12h	Rect Femoris	Left	16.59	298	1.56	18.7	1.17	12h	Gastr c m	Left	16.32	269	0.95	19.3	1.18	12h	Deltoideus	Left	14.06	217	0.76	21.6	1.26	12h	Bic Fem c br	Left	17.47	315	1.24	16.9	1.05	12h	Add Pollicis	Left	18.05	302	1.26	15.4	0.93
12h	Tric Br c l	Right	13.48	207	1.13	22.2	1.3	12h	Rect Femoris	Right	16.4	294	1.48	17.7	1.1	12h	Gastr c m	Right	15.15	270	1.03	19.8	1.22	12h	Deltoideus	Right	15.62	245	0.84	18.3	1.07	12h	Bic Fem c br	Right	17.58	321	1.32	16.5	1.03	12h	Add Pollicis	Right	17.46	272	1.12	17	1.02
12h	Tric Br c l	Right	13.68	209	1.11	22.1	1.29	12h	Rect Femoris	Right	16.01	299	1.4	18	1.12	12h	Gastr c m	Right	15.06	270	1.02	19.8	1.22	12h	Deltoideus	Right	15.52	252	0.82	18.3	1.08	12h	Bic Fem c br	Right	17.67	333	1.29	16.1	1.01	12h	Add Pollicis	Right	17.08	266	1.1	17.3	1.04
12h	Tric Br c l	Right	13.38	209	1.11	22.2	1.3	12h	Rect Femoris	Right	16.1	298	1.41	17.6	1.1	12h	Gastr c m	Right	15.06	266	1.03	20	1.23	12h	Deltoideus	Right	15.42	246	0.82	18.4	1.08	12h	Bic Fem c br	Right	17.77	335	1.27	16.1	1.01	12h	Add Pollicis	Right	17.18	266	1.1	17.3	1.04
12h	Tric Br c l	Right	13.19	203	1.09	22.1	1.27	12h	Rect Femoris	Right	15.99	297	1.42	17.5	1.09	12h	Gastr c m	Right	15.06	269	1.05	19.9	1.22	12h	Deltoideus	Right	15.41	243	0.83	18.3	1.06	12h	Bic Fem c br	Right	17.77	333	1.28	16.3	1.02	12h	Add Pollicis	Right	16.98	259	1.08	17.5	1.05
12h	Tric Br c l	Right	13.78	209	1.11	21.6	1.25	12h	Rect Femoris	Right	16.1	306	1.46	17.6	1.1	12h	Gastr c m	Right	14.96	269	1.06	20.1	1.24	12h	Deltoideus	Right	15.5	246	0.82	18.4	1.08	12h	Bic Fem c br	Right	17.57	331	1.29	16.3	1.02	12h	Add Pollicis	Right	17.18	262	1.1	17.2	1.03
15h	Tric Br c l	Left	15.26	260	1.3	18.6	1.1	15h	Rect Femoris	Left	15.64	282	1.47	19.7	1.22	15h	Gastr c m	Left	18.47	281	1.06	18.4	1.13	15h	Deltoideus	Left	13.7	205	0.79	21.8	1.23	15h	Bic Fem c l	Left	17.48	311	1.19	16.8	1.04	15h	Abd Poll Br	Left	19.05	387	1.38	13.1	0.81
15h	Tric Br c l	Left	15.26	273	1.28	17.9	1.06	15h	Rect Femoris	Left	15.75	286	1.5	19.4	1.21	15h	Gastr c m	Left	18.67	290	1.02	18.2	1.14	15h	Deltoideus	Left	13.7	204	0.79	21.8	1.23	15h	Bic Fem c l	Left	17.48	311	1.17	16.8	1.04	15h	Abd Poll Br	Left	19.05	396	1.4	13.1	0.82
15h	Tric Br c l	Left	15.36	273	1.3	17.7	1.05	15h	Rect Femoris	Left	15.64	290	1.5	19.4	1.21	15h	Gastr c m	Left	18.77	295	1.03	18	1.11	15h	Deltoideus	Left	13.7	209	0.77	21.9	1.25	15h	Bic Fem c l	Left	17.39	314	1.2	16.8	1.04	15h	Abd Poll Br	Left	19.05	398	1.36	13.1	0.81
15h	Tric Br c l	Left	15.26	276	1.28	17.7	1.06	15h	Rect Femoris	Left	15.75	294	1.56	19.2	1.2	15h	Gastr c m	Left	18.77	294	1.03	17.9	1.12	15h	Deltoideus	Left	13.7	209	0.77	22	1.26	15h	Bic Fem c l	Left	17.21	315	1.22	16.9	1.05	15h	Abd Poll Br	Left	19.34	402	1.38	13	0.81
15h	Tric Br c l	Left	15.26	272	1.27	17.9	1.06	15h	Rect Femoris	Left	15.84	299	1.52	19.1	1.2	15h	Gastr c m	Left	18.48	282	1.05	18.3	1.12	15h	Deltoideus	Left	13.7	206	0.75	21.7	1.23	15h	Bic Fem c l	Left	17.31	316	1.22	16.9	1.05	15h	Abd Poll Br	Left	19.63	401	1.36	12.8	0.8
15h	Tric Br c l	Right	13.51	211	1.22	22.4	1.32	15h	Rect Femoris	Right	16.03	281	1.4	18.4	1.13	15h	Gastr c m	Right	18.37	276	1.23	19.8	1.22	15h	Deltoideus	Right	15.06	239	0.87	19	1.11	15h	Bic Fem c l	Right	17	301	1.22	17.8	1.1	15h	Abd Poll Br	Right	22.36	490	1.78	10.4	0.67
15h	Tric Br c l	Right	13.7	210	1.2	22.5	1.31	15h	Rect Femoris	Right	15.94	291	1.39	18.3	1.13	15h	Gastr c m	Right	18.37	270	1.2	19.6	1.2	15h	Deltoideus	Right	15.06	240	0.84	18.8	1.09	15h	Bic Fem c l	Right	17.1	312	1.31	17.4	1.08	15h	Abd Poll Br	Right	21.95	495	1.83	10.5	0.68
15h	Tric Br c l	Right	13.7	216	1.21	22.3	1.31	15h	Rect Femoris	Right	15.93	291	1.4	18.3	1.13	15h	Gastr c m	Right	18.37	274	1.2	19.9	1.23	15h	Deltoideus	Right	14.96	239	0.81	19	1.12	15h	Bic Fem c l	Right	17.48	318	1.27	16.8	1.04	15h	Abd Poll Br	Right	22.45	513	1.84	10.2	0.66
15h	Tric Br c l	Right	13.7	217	1.19	22.6	1.34	15h	Rect Femoris	Right	15.93	292	1.42	18.4	1.14	15h	Gastr c m	Right	18.18	269	1.23	19.8	1.21	15h	Deltoideus	Right	14.96	245	0.82	19.1	1.13	15h	Bic Fem c l	Right	17.68	322	1.29	16.6	1.03	15h	Abd Poll Br	Right	22.16	514	1.78	10.1	0.65
15h	Tric Br c l	Right	13.9	210	1.16	22.7	1.33	15h	Rect Femoris	Right	16.13	296	1.42	18.1	1.12	15h	Gastr c m	Right	18.37	275	1.21	19.7	1.21	15h	Deltoideus	Right	15.06	242	0.82	18.8	1.11	15h	Bic Fem c l	Right	17.48	320	1.25	16.9	1.05	15h	Abd Poll Br	Right	22.16	509	1.86	10.1	0.65
18h	Tric Br c l	Left	16.42	287	1.28	17.2	1.04	18h	Rect Femoris	Left	16.2	294	1.42	19.5	1.22	18h	Gastr c m	Left	17.03	262	1.15	20.5	1.27	18h	Deltoideus	Left	13.58	201	0.8	22.2	1.28	18h	Bic Fem c l	Left	17.21	306	1.19	17.5	1.08	18h	Abd Poll Br	Left	17.11	294	1.17	16.6	1
18h	Tric Br c l	Left	16.22	287	1.24	17.3	1.04	18h	Rect Femoris	Left	16.01	293	1.4	19.4	1.22	18h	Gastr c m	Left	17.13	262	1.14	20.5	1.28	18h	Deltoideus	Left	13.3	198	0.8	22.8	1.31	18h	Bic Fem c l	Left	16.91	305	1.16	17.6	1.08	18h	Abd Poll Br	Left	17.31	291	1.14	16.2	0.97
18h	Tric Br c l	Left	16.32	286	1.25	17.3	1.04	18h	Rect Femoris	Left	16.1	288	1.42	19.3	1.2	18h	Gastr c m	Left	17.13	262	1.15	20.6	1.29	18h	Deltoideus	Left	13.2	198	0.8	22.7	1.3	18h	Bic Fem c l	Left	16.83	302	1.12	17.5	1.09	18h	Abd Poll Br	Left	17.88	299	1.17	15.7	0.94
18h	Tric Br c l	Left	16.51	289	1.25	17.2	1.04	18h	Rect Femoris	Left	16.01	293	1.4	19.6	1.23	18h	Gastr c m	Left	17.13	263	1.16	20.4	1.27	18h	Deltoideus	Left	13.3	205	0.8	22.7	1.32	18h	Bic Fem c l	Left	16.63	306	1.15	17.7	1.1	18h	Abd Poll Br	Left	17.79	295	1.2	15.8	0.94
18h	Tric Br c l	Left	16.51	289	1.24	17.2	1.04	18h	Rect Femoris	Left	16.01	292	1.42	19.6	1.23	18h	Gastr c m	Left	17.13	265	1.18	20.5	1.28	18h	Deltoideus	Left	12.91	192	0.78	23.3	1.33	18h	Bic Fem c l	Left	16.52	298	1.14	17.7	1.09	18h	Abd Poll Br	Left	18.08	300	1.16	15.7	0.94
18h	Tric Br c l	Right	14.08	230	1.16	21.6	1.29	18h	Rect Femoris	Right	15.72	288	1.32	18.5	1.14	18h	Gastr c m	Right	17.72	275	1.22	20.2	1.27	18h	Deltoideus	Right	15.72	252	0.82	18.1	1.06	18h	Bic Fem c l	Right	17.6	317	1.11	16.9	1.05	18h	Abd Poll Br	Right	18.27	319	1.29	15.5	0.95
18h	Tric Br c l	Right	13.99	235	1.16	21.3	1.27	18h	Rect Femoris	Right	15.72	288	1.29	18.6	1.15	18h	Gastr c m	Right	17.62	276	1.22	20.3	1.27	18h	Deltoideus	Right	15.62	251	0.81	18.2	1.07	18h	Bic Fem c l	Right	17.88	323	1.15	16.6	1.03	18h	Abd Poll Br	Right	17.98	312	1.27	15.7	0.95
18h	Tric Br c l	Right	13.69	230	1.12	21.7	1.28	18h	Rect Femoris	Right	15.81	292	1.31	18.5	1.15	18h	Gastr c m	Right	17.72	275	1.19	20.1	1.26	18h	Deltoideus	Right	15.62	252	0.8	18	1.05	18h	Bic Fem c l	Right	17.7	323	1.16	16.9	1.06	18h	Abd Poll Br	Right	18.08	311	1.23	15.7	0.95
18h	Tric Br c l	Right	13.99	233	1.13	21.2	1.26	18h	Rect Femoris	Right	15.52	287	1.29	18.9	1.18	18h	Gastr c m	Right	18	281	1.17	19.8	1.25	18h	Deltoideus	Right	15.43	256	0.79	18.3	1.08	18h	Bic Fem c l	Right	17.6	318	1.13	17	1.06	18h	Abd Poll Br	Right	18.18	313	1.25	15.7	0.96
18h	Tric Br c l	Right	14.18	237	1.17	21.2	1.27	18h	Rect Femoris	Right	15.52	286	1.3	18.9	1.18	18h	Gastr c m	Right	17.9	281	1.16	19.7	1.24	18h	Deltoideus	Right	15.52	257	0.78	18.3	1.08	18h	Bic Fem c l	Right	17.7	317	1.09	16.8	1.05	18h	Abd Poll Br	Right	18.07	308	1.23	15.6	0.95

[truncated: 1 more sheets: Participant_16]
